# Supplementary material for: Recent developments in multimodality fluorescence imaging probes
Source: PubMed Central journal article supplement — Acta Pharm Sin B. 2018 Mar 30;8(3):320–38. doi: 10.1016/j.apsb.2018.03.010 (PMC5989919; doi:10.1016/j.apsb.2018.03.010), 2018-03-30
Supplement: mmc1.pdf [file mmc1.pdf]

# Supporting Information

## REVIEW

### Recent developments in multimodality fluorescence imaging probes

Jianhong Zhao<sup>a</sup>, Junwei Chen<sup>a</sup>, Shengnan Ma<sup>a</sup>, Qianqian Liu<sup>a</sup>, Lixian Huang<sup>a</sup>, Xiani Chen<sup>a</sup>, Kaiyan Lou<sup>a,\*</sup>, Wei Wang<sup>a,b,\*</sup>

<sup>a</sup>Shanghai Key Laboratory of Chemical Biology, School of Pharmacy, and State Key Laboratory of Bioengineering Reactor, East China University of Science and Technology, Shanghai 200237, China

<sup>b</sup>Department of Chemistry and Chemical Biology, University of New Mexico, Albuquerque, NM 87131-0001, USA

\*Corresponding authors. Tel./fax: +86 21 64253299 (Kaiyan Lou); Tel.: +1 505 2770756; fax: +1 505 2772609 (Wei Wang).

E-mail addresses: kylou@ecust.edu.cn (Kaiyan Lou); wwang@unm.edu (Wei Wang).

**Table S1** Comparison of optical fluorescence imaging with other imaging modalities (adapted from reference<sup>1</sup> with modifications).

| Modalities | Spatial Resolution                                                   | Depth of Penetration | Imaging time | Sensitivity (mol/L)                         | Multiplexing Capability | Safety                | Cost            | Clinical Availability  | Imaging/Contrast Agent                                                                                          | Information Provided                                                             |
|------------|----------------------------------------------------------------------|----------------------|--------------|---------------------------------------------|-------------------------|-----------------------|-----------------|------------------------|-----------------------------------------------------------------------------------------------------------------|----------------------------------------------------------------------------------|
| OFI        | Highest in vitro cell imaging<br>Low in vivo tissue imaging (2-3 mm) | < 1 cm               | s–min        | High (10 <sup>-9</sup> -10 <sup>-12</sup> ) | Yes                     | Relatively safe       | Low             | Optical guided surgery | Organic fluorophores<br>Quantum dots<br>Polymer dots<br>Upconversion materials, etc.                            | Functional information: biomarker, physiological information, receptor, and etc. |
| CT         | High (0.5–1 mm)                                                      | Unlimited            | min          | Low for soft tissues (ND)                   | No                      | Ionizing radiation    | Relatively high | Yes                    | Iodinated molecules<br>Gold nanoparticles<br>Bi <sub>2</sub> S <sub>3</sub> , TaO <sub>x</sub> , etc.           | Mainly 3D anatomy                                                                |
| MRI        | High (~1 mm)                                                         | Unlimited            | (min)        | Very Low, Better than CT for soft           | No                      | No ionizing radiation | High            | Yes                    | Gd <sup>3+</sup> and Mn <sup>2+</sup> complexes,<br>Superparamagnetic iron oxide nanoparticles, <sup>19</sup> F | 3D anatomy<br>Physiological information                                          |

|       |                        |                    |       |                                                                                  |     |                       |                    |          |                                                                                                   |                                               |
|-------|------------------------|--------------------|-------|----------------------------------------------------------------------------------|-----|-----------------------|--------------------|----------|---------------------------------------------------------------------------------------------------|-----------------------------------------------|
| PET   | low<br>5–7 mm          | Unlimited          | s–min | tissues<br>( $10^{-3}$ - $10^{-5}$ )<br>Very High<br>( $10^{-11}$ - $10^{-12}$ ) | No  | Ionizing<br>radiation | High               | Yes      | Radioisotopes: $^{18}\text{F}$ , $^{64}\text{Cu}$ ,<br>$^{68}\text{Ga}$ , $^{89}\text{Zr}$ , etc. | 3D distributions of PET<br>nuclides           |
| SPECT | low<br>8–10 mm         | Unlimited          | min   | High<br>( $10^{-10}$ - $10^{-11}$ )                                              | Yes | Ionizing<br>radiation | Relatively<br>high | Yes      | Radioisotopes: $^{99\text{m}}\text{Tc}$ , $^{111}\text{In}$ ,<br>$^{177}\text{Lu}$ , etc.         | 3D distributions of SPECT<br>nuclides         |
| PAI   | Very high<br>0.15–1 mm | Deep<br>Up to 7 cm | s–min | Relatively<br>low<br>compared<br>with OFI                                        | Yes | Relatively safe       | Low                | Emerging | High NIR absorbance<br>material: NIRF dyes, gold<br>nanorods, carbon<br>nanotubes, etc.           | Both functional and<br>anatomical information |

**Table S2** Representative OFI/CT dual-modality imaging probes.

| Category  | Fluorophore                                      | CT Contrast Agent       | Imaging Agents                                                           | Fluorescence Imaging Conditions                                                      | Imaging Modalities | Targeting Moiety           | Biological Targets                     | Combined Therapy | Disease                | Reference                                         |
|-----------|--------------------------------------------------|-------------------------|--------------------------------------------------------------------------|--------------------------------------------------------------------------------------|--------------------|----------------------------|----------------------------------------|------------------|------------------------|---------------------------------------------------|
| Nanoprobe | Cu-doped CdS Quantum dots (QDs)                  | $\text{Ba}^{2+}$        | $\text{Ba}^{2+}$ -doped HAp-Cu:CdS QDs-HA                                | $\lambda_{\text{ex}} = 488 \text{ nm}$<br>$\lambda_{\text{em}} = 700 \text{ nm}$     | NIRF/CT            | Hyaluronic acid (HA)       | HA receptors                           | N/A              | Cancer                 | Microchem. J. 2017, 134, 41-48 <sup>2</sup>       |
| Nanoprobe | Persistent luminescence nanoparticles ZGGO:Cr,Pr | $\text{TaO}_x$          | NGR-ZGGO:Cr,Pr@ $\text{TaO}_x$ @ $\text{SiO}_2$                          | ( $\lambda_{\text{ex}} = 254 \text{ nm}$ )<br>$\lambda_{\text{em}} = 695 \text{ nm}$ | NIRF/CT            | the cyclic CNGRCGG peptide | CD 13 enzyme                           | N/A              | Cancer                 | Nanoscale 2015, 7, 17929-17937 <sup>3</sup>       |
| Nanoprobe | CdSe/ZnS QDs                                     | $\text{Bi}_2\text{S}_3$ | Core-shell $\text{Bi}_2\text{S}_3$ -CdSe/ZnS QD@ $\text{SiO}_2$ -PEG NPs | $\lambda_{\text{ex}} = 488 \text{ nm}$<br>$\lambda_{\text{em}} = 633 \text{ nm}$     | OFI/CT             | N/A                        | N/A                                    | N/A              | N/A                    | Chem. Commun. 2013, 49, 11800-11802 <sup>4</sup>  |
| Nanoprobe | $\text{Ag}_2\text{S}$ QDs                        | Iodinated oil           | $\text{Ag}_2\text{S}$ -I@DSPE-PEG <sub>2000</sub> -FA                    | $\lambda_{\text{ex}} = 868 \text{ nm}$<br>$\lambda_{\text{em}} = 1170 \text{ nm}$    | OTN-NIR/CT         | Folic acid                 | FA receptors                           | N/A              | Cancer                 | Nanoscale 2015, 7, 19484-19492 <sup>5</sup>       |
| Nanoprobe | Quantum dots (QDs)                               | Iodinated oil           | Core-shell CdSe/ZnS QDs-iodinated oil nanoemulsion                       | $\lambda_{\text{ex}} = 488 \text{ nm}$<br>$\lambda_{\text{em}} = 620 \text{ nm}$     | NIRF/CT            | N/A                        | Macrophages in atherosclerotic plaques | N/A              | Cardiovascular disease | Biomaterial 2013, 34, 209-216 <sup>6</sup>        |
| Nanoprobe | Cy5.5                                            | Iodinated oil           | Iodinated oil @ Cy5.5-DSPE liposomes                                     | $\lambda_{\text{ex}} = 650 \text{ nm}$<br>$\lambda_{\text{ex}} = 700 \text{ nm}$     | NIRF/CT            | N/A                        | N/A                                    | N/A              | Cancer                 | Mol. Imaging 2013, 12, 148-160 <sup>7</sup>       |
| Nanoprobe | Gold nanoclusters (Au NCs)                       | Au NCs                  | lysozyme-capped gold nanoclusters (FA-Lys-Au NCs)                        | $\lambda_{\text{ex}} = 550 \text{ nm}$<br>$\lambda_{\text{ex}} = 690 \text{ nm}$     | NIRF/CT            | Folic acid                 | FA receptors                           | N/A              | Cancer                 | J. Mater. Chem. B 2016, 4, 1276-1283 <sup>8</sup> |

|           |               |                    |                                              |                                                                                      |         |            |              |     |        |                                                   |
|-----------|---------------|--------------------|----------------------------------------------|--------------------------------------------------------------------------------------|---------|------------|--------------|-----|--------|---------------------------------------------------|
| Nanoprobe | CdSe/ZnS QDs  | Au nanorods (GNRs) | GNR@SiO <sub>2</sub> @QDs-FA                 | $\lambda_{\text{ex}} = 488 \text{ nm}$<br>$\lambda_{\text{em}} = 620 \text{ nm}$     | OFI/CT  | Folic acid | FA receptors | PTT | Cancer | J. Mater. Chem. B 2014, 2, 1945-1953 <sup>9</sup> |
| Naoprobe  | AIE dye NPAPF | Au NPs             | M-NPAPF-Au@DSPE-PEG <sub>2000</sub> micelles | $\lambda_{\text{ex}} = 488 \text{ nm}$<br>$\lambda_{\text{em}} = 600-850 \text{ nm}$ | NIRF/CT | N/A        | N/A          | N/A | N/A    | Biomaterials 2015, 42, 103-111 <sup>10</sup>      |

**Table S3** Representative dual-modality OFI/MRI imaging probes.

| Category             | Fluorophore                                | MRI Contrast Agents                                                                | Imaging Agents                                                                                       | Fluorescence Imaging Conditions                                                                          | Imaging Modalities | Targeting Moiety | Biological Targets | Combined Therapy  | Disease                | Reference                                                 |
|----------------------|--------------------------------------------|------------------------------------------------------------------------------------|------------------------------------------------------------------------------------------------------|----------------------------------------------------------------------------------------------------------|--------------------|------------------|--------------------|-------------------|------------------------|-----------------------------------------------------------|
| Nanoprobe            | IR-808                                     | Gd-DTPA                                                                            | IR-808-Gd-MSNs (mesoporous silica NPs)                                                               | $\lambda_{\text{ex}} = 778 \text{ nm}$<br>$\lambda_{\text{em}} = 808 \text{ nm}$                         | NIRF/MRI           | N/A              | N/A                | N/A               | Cancer                 | J. Nanomater. 2016, 6502127 <sup>11</sup>                 |
| Nanoprobe            | Cy5                                        | Gd <sup>3+</sup>                                                                   | Gd-Al@MSNs-Cy5                                                                                       | $\lambda_{\text{ex}} = 625 \text{ nm}$<br>$\lambda_{\text{ex}} = 690 \text{ nm}$                         | NIRF/MRI           | N/A              | N/A                | N/A               | N/A                    | Anal. Methods 2016, 8, 214-221 <sup>12</sup>              |
| Nanoprobe            | Ru(bpy) <sub>3</sub> <sup>2+</sup>         | Gd <sup>3+</sup>                                                                   | Ru/Gd-Al@MSNs                                                                                        | $\lambda_{\text{ex}} = 480 \text{ nm}$<br>$\lambda_{\text{em}} = 700 \text{ nm}$                         | NIRF/MRI           | N/A              | N/A                | N/A               | cancer                 | Analyst 2014, 139, 4613-4619 <sup>13</sup>                |
| Nanoprobe            | Persistent luminescence nanoparticles      | Gd-DTPA                                                                            | Gd(III)-PLNPs                                                                                        | $\lambda_{\text{ex}} = 254 \text{ nm}$<br>$\lambda_{\text{em}} = 700 \text{ nm}$                         | NIRF/MRI           | N/A              | N/A                | N/A               | cancer                 | Anal. Chem. 2014, 86, 4096-4101 <sup>14</sup>             |
| Nanoprobe            | Lanthanide nanocrystals (upconversion NCs) | NaGdF <sub>4</sub> /NaDy F <sub>4</sub> (dual T <sub>1</sub> /T <sub>2</sub> mode) | NaDyF <sub>4</sub> :Yb <sup>3+</sup> /NaGdF <sub>4</sub> :Yb <sup>3+</sup> ,Er <sup>3+</sup> NCs-Ce6 | $\lambda_{\text{ex}} = 980 \text{ nm}$<br>(NIRF/PDT)<br>$\lambda_{\text{em}} = 523, 546, 660 \text{ nm}$ | NIRF/MRI           | N/A              | N/A                | PDT (chlorine e6) | cancer                 | Nanoscale, 2014, 6, 12609-12617 <sup>15</sup>             |
| Nanoprobe            | Carbon QDs (CQDs)                          | Gd <sup>3+</sup>                                                                   | Gd-encapsulated CQDs                                                                                 | $\lambda_{\text{ex}} = 354 \text{ nm}$<br>$\lambda_{\text{em}} = \sim 445 \text{ nm}$                    | OFI/MRI            | N/A              | N/A                | N/A               | Cardiovascular disease | J. Mater. Chem. B, 2017, 5, 92-101 <sup>16</sup>          |
| Nanoprobe            | CQDs                                       | Gd-DTPA                                                                            | CQD-DTPA-Gd                                                                                          | $\lambda_{\text{ex}} = 350-500 \text{ nm}$<br>$\lambda_{\text{em}} = 460-580 \text{ nm}$                 | OFI/MRI            | N/A              | N/A                | N/A               | N/A                    | Carbon 2015, 93, 742-750 <sup>17</sup>                    |
| Nanoprobe            | Tb <sup>3+</sup> -doped                    | Gd <sub>2</sub> O <sub>3</sub>                                                     | Gd <sub>2</sub> O <sub>3</sub> :Tb                                                                   | $\lambda_{\text{ex}} = 285 \text{ nm}$<br>$\lambda_{\text{em}} = 543.5 \text{ nm}$                       | OFI/MRI            | N/A              | N/A                | N/A               | N/A                    | Phys. Chem. Chem. Phys. 2015, 17, 1189-1196 <sup>18</sup> |
| Star-like polymer    | Porphyrin                                  | Gd-DTPA                                                                            | PEG-PP-DPTA-Gd <sup>3+</sup>                                                                         | $\lambda_{\text{ex}} = 600 \text{ nm}$<br>$\lambda_{\text{em}} = 710 \text{ nm}$                         | NIRF/MRI           | N/A              | N/A                | N/A               | cancer                 | Polymer 2016, 88, 94-101 <sup>19</sup>                    |
| Dendrimer            | Fluorescent POSS                           | Gd <sup>3+</sup>                                                                   | POSS-HPG-Gd                                                                                          | $\lambda_{\text{em}} = 570 \text{ nm}$                                                                   | OFI/MRI            | N/A              | N/A                | N/A               | cancer                 | Polym. Chem. 2013, 4, 1517-1524 <sup>20</sup>             |
| Dendrimer (two-step) | Rhodamine Green                            | Gd-DTPA                                                                            | Gd(III)-1B4M-DTPA-PAMAM-Biotin/Rhodamine Green                                                       | N/A                                                                                                      | OFI/MRI            | N/A              | N/A                | N/A               | Ovarian cancer         | Bioconjugate Chem. 2007, 18, 1474-1482 <sup>21</sup>      |

|                                  |                                       |                                           | labelled avidin                                        |                                                                           |          |               |                                             |                       |                   |                                                                     |  |
|----------------------------------|---------------------------------------|-------------------------------------------|--------------------------------------------------------|---------------------------------------------------------------------------|----------|---------------|---------------------------------------------|-----------------------|-------------------|---------------------------------------------------------------------|--|
| Nanoprobe                        | PfVBT                                 | iron oxide                                | IOs@PLGA-PEG-FOL                                       | $\lambda_{ex}$ = 518 nm<br>$\lambda_{em}$ = 636 nm                        | NIRF/MRI | Folic acid    | Folate receptor                             | N/A                   | cancer            | Adv. Funct. Mater. 2012, 22, 3107–3115 <sup>22</sup>                |  |
| Nanoprobe                        | Sulforhodamine101 (SR101)             | Fe <sub>3</sub> O <sub>4</sub>            | Fe <sub>3</sub> O <sub>4</sub> -PEG-PAE-SR101          | $\lambda_{ex}$ = 592 nm<br>$\lambda_{em}$ = 612 nm                        | OFI/MRI  | PAE           | Cancer microenvironment                     | N/A                   | Cancer            | J. Mater. Chem. 2010, 20, 5454-5461 <sup>23</sup>                   |  |
| Nanoprobe (core-shell)           | Cy5.5                                 | USPIOs                                    | Cy5.5-APTES-USPIOs-silica(SCION)                       | $\lambda_{ex}$ = 675 nm<br>$\lambda_{em}$ = 694 nm                        | NIRF/MRI | N/A           | N/A                                         | N/A                   | N/A               | Nanotechnology 2010, 21, 175704 <sup>24</sup>                       |  |
| Nanoprobe                        | Cy7                                   | iron oxide nanocrystals                   | FeO-PAV-RGD-DSPC-PEG-DSPE-Cy7                          | $\lambda_{ex}$ = 710-760 nm<br>$\lambda_{em}$ = 810-875 nm                | NIRF/MRI | RGD           | $\alpha_v\beta_3$ integrin                  | Chemotherapy (PAV)    | Cancer            | ACS Nano 2011, 5, 4422-4433 <sup>25</sup>                           |  |
| Nanoprobe (core-shell)           | NIR797                                | SPIO                                      | NIR797-PLL-SPIO-PAA                                    | $\lambda_{ex}$ =684-729 nm<br>$\lambda_{em}$ =745 nm                      | NIRF/MRI | N/A           | dendritic cells in the draining lymph nodes | N/A                   | Cancer metastasis | Cytotherapy 2014, 16, 699-710 <sup>26</sup>                         |  |
| Nanoprobe (core-shell)           | CdSe-CdS QDs                          | Fe <sub>3</sub> O <sub>4</sub>            | mPEG-silica-CdSe-Cds-Fe <sub>3</sub> O <sub>4</sub>    | N/A                                                                       | NIRF/MRI | N/A           | N/A                                         | N/A                   | cancer            | Nat. Commun. 2014, 5, 5093 <sup>27</sup>                            |  |
| Nanoprobe (core-shell)           | NIR-830                               | Hydrophobic iron oxide nanocrystals       | IONP-NIR830                                            | $\lambda_{ex}$ = 684-729 nm<br>$\lambda_{em}$ = 745 nm (long pass filter) | NIRF/MRI | N/A           | sentinel lymph node                         | N/A                   | Cancer metastasis | J. Biomater. Appl. 2013, 28, 100-111 <sup>7</sup>                   |  |
| Nanoprobe (core-shell, liposome) | CdSe QDs                              | Fe <sub>3</sub> O <sub>4</sub>            | cRGD-MF-liposomes                                      | $\lambda_{ex}$ = 468 nm<br>$\lambda_{em}$ = 532 nm                        | OFI/MRI  | cRGDyk        | $\alpha_v\beta_3$ integrin                  | N/A                   | Cancer metastasis | J. Liposome Res. 2015, 25, 89-100 <sup>28</sup>                     |  |
| Nanoprobe                        | Oligo( <i>p</i> -phenyleneethynylene) | Fe <sub>3</sub> O <sub>4</sub>            | MNPs@OPE-PEG-FA                                        | $\lambda_{ex}$ = 720 nm (two-photon)<br>$\lambda_{em}$ = ~ 460 nm         | OFI/MRI  | Folic acid    | Folate receptor                             | N/A                   | cancer            | Nanoscale 2015, 7, 8907-8919 <sup>29</sup>                          |  |
| Nanoprobe                        | Cy5.5                                 | Superparamagnetic iron oxide NPs (SPIONs) | RMNs-HSA-Cy5.5                                         | N/A                                                                       | NIRF/MRI | S-S           | GSH-triggered protein release               | Protein drug delivery | cancer            | ACS Appl. Mater. Interfaces 2017, 9, 19184-19192 <sup>30</sup>      |  |
| Nanoprobe                        | Cy5.5                                 | Nano-Fe <sub>3</sub> O <sub>4</sub>       | Cy5.5-GX1-nanoFe <sub>3</sub> O <sub>4</sub>           | N/A                                                                       | NIRF/MRI | GX1 (peptide) | New vessels of gastric cancer               | N/A                   | gastric cancer    | Artif. Cells, Nanomed., Biotechnol. 2017, 45, 399-403 <sup>31</sup> |  |
| Nanoprobe (antibody)             | Cy5.5                                 | Fe <sub>3</sub> O <sub>4</sub>            | Cy5.5-OPN-DMSA-MNPs (COD-MNPs),                        | N/A                                                                       | OFI/MRI  | OPN antibody  | Osteopontin (OPN)                           | N/A                   | atherosclerosis   | Biomaterials 2017, 112, 336-345 <sup>32</sup>                       |  |
| Nanoprobe (core-shell)           | ICG                                   | SPIO                                      | SPIO@Liposome-ICG-RGD                                  | N/A                                                                       | NIRF/MRI | RGD           | $\alpha_v\beta_3$ integrin                  | N/A                   | Liver cancer      | Oncotarget 2017, 8, 32741-32751 <sup>33</sup>                       |  |
| Nanoprobe (core-shell)           | Cy3                                   | Iron NPs                                  | Cy3-S6 aptamer-conjugated magentic core-gold shell NPs | $\lambda_{ex}$ = 1064 nm (PTT)                                            | OFI/MRI  | S6 aptamer    | Circulating tumor cells (CTC)s              | PTT                   | cancer            | Mol. Pharm. 2013, 10, 857-866 <sup>34</sup>                         |  |
| Nanoprobe (core-shell)           | CuInS <sub>2</sub> (QDs)              | Mn <sup>2+</sup>                          | PEGylated CuInS <sub>2</sub> @ZnS:Mn                   | $\lambda_{ex}$ =503-548 nm<br>$\lambda_{em}$ = 560 nm (long-pass filter)  | OFI/MRI  | N/A           | N/A                                         | N/A                   | cancer            | Biomaterials 2014, 35,1608-1617 <sup>35</sup>                       |  |
| Nanoprobe (core-shell)           | ETTA                                  | <sup>19</sup> F                           | ETTA@PSI <sub>OAm</sub> -PDTES-RGD                     | $\lambda_{ex}$ = 362 nm<br>$\lambda_{em}$ = around 490                    | OFI/MRI  | RGD           | $\alpha_v\beta_3$ integrin                  | N/A                   | cancer            | Nanoscale 2017, 9, 7163-7168 <sup>36</sup>                          |  |

|                           |                                     |                  |                                                                                        |                                                    |          |                                 |                                                                              |                    |               |                                                                                         |
|---------------------------|-------------------------------------|------------------|----------------------------------------------------------------------------------------|----------------------------------------------------|----------|---------------------------------|------------------------------------------------------------------------------|--------------------|---------------|-----------------------------------------------------------------------------------------|
| Nanoprobe (core-shell)    | Cy5                                 | <sup>19</sup> F  | Folate-mFLAME-DOX                                                                      | N/A                                                | OFI/MRI  | Folic acid                      | Folate receptor                                                              | Chemotherapy (DOX) | cancer        | Chem. Sci. 2015, 6, 1986-1990 <sup>37</sup>                                             |
| closomers                 | sulforhodamine-B                    | <sup>19</sup> F  | <sup>19</sup> F-B <sub>12</sub> -FL (double-labelled isosahedral B <sub>12</sub> ion)  | $\lambda_{em} = 570$ nm                            | OFI/MRS  | N/A                             | N/A                                                                          | N/A                | N/A           | Chem. Commun. 2014, 50, 5793-5795 <sup>38</sup>                                         |
| Enzyme                    | Cy5.5                               | Gd-DOTA          | Gd <sup>3+</sup> -bCD-PLL-Cy5.5-rhodamine (dual-labelled bacterial cytosine deaminase) | N/A                                                | NIRF/MRI | N/A                             | endothelial progenitor cells (EPCs)                                          | N/A                | cancer        | PLoS One. 2012, 7, e50575 <sup>39</sup><br>Mol. Imaging 2011, 10, 359-369 <sup>40</sup> |
| Small molecule            | IR-783                              | Gd-DOTA          | Gd <sup>3+</sup> -IR-783-PEG                                                           | $\lambda_{ex} = 745$ nm<br>$\lambda_{em} = 810$ nm | NIRF/MRI | IR-783                          | Enhanced cell uptake through organic-anion transporting polypeptides (OATPs) | N/A                | cancer        | JACS 2015, 137, 9108-9116 <sup>41</sup>                                                 |
| Small molecules           | Cy7, BODIPY, Fluorescein, Rhodamine | Gd-DOTA          | Cy7-Gd, FL-Gd, BDP-Gd, Rhoda-Gd                                                        | Depending on the dye used                          | OFI/MRI  | Cy7                             | Enhanced cell uptake                                                         | N/A                | N/A           | Bioconjugate Chem. 2011, 22, 2227-2236 <sup>42</sup>                                    |
| Small molecule            | Cy7                                 | Gd-DTPA          | LS-479-Gd <sup>3+</sup>                                                                | N/A                                                | NIRF/MFI | Cy7 dye                         | Serum albumin                                                                | N/A                | N/A           | Chem. Commun. 2010, 46, 3705-3707 <sup>43</sup>                                         |
| Small molecule (two-step) | Alexa Fluor 488                     | Gd-DOTA          | Biotin-Gd-DOTA-mGluR5-antagonist/Alexa Fluor 488 labelled avidin                       | N/A                                                | OFI/MRI  | mGluR <sub>5</sub> -antagonists | metabotropic Glu receptor subtype 5 (mGluR <sub>5</sub> )                    | N/A                | CNS disorders | ACS Chem. Neurosci. 2014, 5, 128-137 <sup>44</sup>                                      |
| Small Molecule            | Zinpyr-1                            | Mn-ZP1           | ZP1-Mn <sup>2+</sup>                                                                   | N/A                                                | OFI/MRI  | N/A                             | Zn <sup>2+</sup>                                                             | N/A                | N/A           | Chem. Commun. 2010, 46, 4139-4141 <sup>45</sup>                                         |
| Small molecule            | Zpy                                 | Gd-Zpy           | Gd-Zpy                                                                                 | $\lambda_{ex} = 488$ nm<br>$\lambda_{em} = 528$ nm | OFI/MRI  | N/A                             | Zn <sup>2+</sup>                                                             | N/A                | N/A           | Tetrahedron 2012, 68, 306-310 <sup>46</sup>                                             |
| Small molecule            | CA (a coumarin dye)                 | Gd-DO3A          | DO3A-Gd-CA                                                                             | $\lambda_{ex} = 408$ nm<br>$\lambda_{em} = 460$ nm | OFI/MRI  | N/A                             | F <sup>-</sup>                                                               | N/A                | N/A           | Sensors 2016, 16, 2165 <sup>47</sup>                                                    |
| Small molecule            | DPPZ                                | Gd <sup>3+</sup> | Gd(TTA) <sub>3</sub> -DPPZ                                                             | $\lambda_{ex} = 340$ nm                            | OFI/MRI  | N/A                             | F <sup>-</sup>                                                               | N/A                | N/A           | Dalton Trans. 2016, 45, 17616-17623 <sup>48</sup>                                       |

**Table S4** Representative OFI/MRI/CT tri-modality imaging probes.

| Category            | Fluorophore                                                                    | MRI Contrast Agents                                  | Imaging Agents                                                                                            | Fluorescence Imaging Conditions                                                            | Imaging Modalities | Targeting Moiety | Biological Targets | Combined Therapy | Disease | Reference                                                    |
|---------------------|--------------------------------------------------------------------------------|------------------------------------------------------|-----------------------------------------------------------------------------------------------------------|--------------------------------------------------------------------------------------------|--------------------|------------------|--------------------|------------------|---------|--------------------------------------------------------------|
| MOF                 | ZnO                                                                            | Fe <sub>3</sub> O <sub>4</sub>                       | Fe <sup>2+</sup> -adsorbed ZIF-8                                                                          | $\lambda_{\text{ex}} = 440 \text{ nm}$<br>$\lambda_{\text{em}} = 535 \text{ nm}$           | FL/MRI/CT          | N/A              | N/A                | N/A              | Cancer  | Adv. Funct. Mater. 2017, 27, 1603926 <sup>49</sup>           |
| Nanoprobe           | Nitrogen-doped Carbon Quantum Dots                                             | Superparamagnetic Fe <sub>3</sub> O <sub>4</sub> NPs | C-Fe <sub>3</sub> O <sub>4</sub> QDs                                                                      | $\lambda_{\text{ex}} = 420, 440 \text{ nm}$<br>$\lambda_{\text{em}} = 520, 570 \text{ nm}$ | OFI/MRI/CT         | N/A              | N/A                | N/A              | Cancer  | Adv. Funct. Mater. 2016, 26, 8694-8706 <sup>50</sup>         |
| Nanoprobe           | Rhodamine B                                                                    | Superparamagnetic Fe <sub>3</sub> O <sub>4</sub> NPs | Fe <sub>3</sub> O <sub>4</sub> @dye-hybrid@ Au-PEG nanocomposites (Au NPs as CT contrast agent)           | $\lambda_{\text{ex}} = 555 \text{ nm}$<br>$\lambda_{\text{em}} = 580 \text{ nm}$           | OFI/MRI/CT         | N/A              | N/A                | PTT              | Cancer  | Small 2013, 9, 2500-2508 <sup>51</sup>                       |
| Nanoprobe           | Cy5                                                                            | Superparamagnetic Fe <sub>3</sub> O <sub>4</sub> NPs | I-fmSiO <sub>4</sub> @SPIONs (iodinated oil as CT contrast agent)                                         | N/A                                                                                        | OFI/MRI/CT         | N/A              | N/A                | N/A              | N/A     | Int. J. Nanomed. 2014, 9, 2527-2538 <sup>52</sup>            |
| Nanoprobe           | DOX<br>Cy5.5                                                                   | Iron-oxide NPs                                       | Cy5.5-WS <sub>2</sub> -IO@MS-PEG/DOX (WS <sub>2</sub> as CT contrast agent)                               | DOX<br>Cy5.5                                                                               | NIRF /MRI/CT       | N/A              | N/A                | PTT chemotherapy | Cancer  | Biomaterials 2015, 60, 62-71 <sup>53</sup>                   |
| Nanoprobe           | IR820                                                                          | Gd-DOTA                                              | Gd-DOTA, Iohexol, IR-820 loaded liposomes                                                                 | $\lambda_{\text{ex}} = 785 \text{ nm}$<br>$\lambda_{\text{em}} = 830 \text{ nm}$           | NIRF/MRI/CT        | N/A              | N/A                | PTT              | Cancer  | Int. J. Nanomed. 2017, 12, 4467-4478 <sup>54</sup>           |
| Nanoprobe           | ICG                                                                            | Gd <sub>2</sub> O <sub>3</sub>                       | Gd <sub>2</sub> O <sub>3</sub> -AuNCs-ICG (AuNCs and Gd <sub>2</sub> O <sub>3</sub> as CT contrast agent) | $\lambda_{\text{ex}} = 635 \text{ nm}$                                                     | NIRF/MRI/CT        | N/A              | N/A                | PDT              | Cancer  | ACS Appl. Mater. Interfaces 2017, 9, 6941-6949 <sup>55</sup> |
| Nanoprobe           | Gold nanoclusters (AuNCs)                                                      | Gd <sup>3+</sup>                                     | Gd <sup>3+</sup> -A-AuNCs@SiO <sub>2</sub> NPs                                                            | $\lambda_{\text{ex}} = 445-490 \text{ nm}$<br>$\lambda_{\text{em}} > 515 \text{ nm}$       | OFI/MRI/CT         | N/A              | N/A                | N/A              | Cancer  | Chem. Eur. J. 2014, 20, 8876-8882 <sup>56</sup>              |
| Nanoprobe (Albumin) | Albumin entrapped gold nanoclusters (CT-active)                                | Gd-DTPA                                              | Hybrid gold-gadolinium NCs                                                                                | $\lambda_{\text{em}} = 660 \text{ nm}$                                                     | NIRF/MRI/CT        | N/A              | N/A                | N/A              | Cancer  | Nanoscale 2013, 5, 1624-1628 <sup>57</sup>                   |
| Nanoprobe           | Eu <sup>3+</sup> doped GdVO <sub>4</sub> nanocastings                          | GdVO <sub>4</sub>                                    | amino acids-capped GdVO <sub>4</sub> :Eu <sup>3+</sup> nanocastings                                       | $\lambda_{\text{ex}} = 330 \text{ nm}$<br>$\lambda_{\text{em}} = 620 \text{ nm}$           | OFI/MRI/CT         | N/A              | N/A                | N/A              | Cancer  | Nanoscale 2014, 6, 12042-12049 <sup>58</sup>                 |
| Nanoprobe           | CaF <sub>2</sub> :Yb <sup>3+</sup> /Er <sup>3+</sup> /Mn <sup>2+</sup> (UPNPs) | Mn <sup>2+</sup> , Yb <sup>3+</sup>                  | UCHNs-PAMA-Pt(IV)                                                                                         | $\lambda_{\text{ex}} = 980 \text{ nm}$<br>$\lambda_{\text{em}} = 655 \text{ nm}$           | OFI/MRI/CT         | N/A              | N/A                | Chemotherapy     | Cancer  | Biomaterials 2015, 50, 154-163 <sup>59</sup>                 |
| Nanoprobe           | NaGdF <sub>4</sub> :Yb <sup>3+</sup> /Er <sup>3+</sup>                         | NaGdF <sub>4</sub>                                   | NaGdF <sub>4</sub> :Yb <sup>3+</sup> /Er <sup>3+</sup> @NaGdF                                             | $\lambda_{\text{ex}} = 793, 980$                                                           | OFI/MRI/CT         | N/A              | N/A                | N/A              | Cancer  | ACS Appl. Mater. Interfaces 2015,                            |

|                        |                                                                                                                    |                                |                                                                                                                         |                                                                                                    |            |     |     |     |                 |  |                                                |
|------------------------|--------------------------------------------------------------------------------------------------------------------|--------------------------------|-------------------------------------------------------------------------------------------------------------------------|----------------------------------------------------------------------------------------------------|------------|-----|-----|-----|-----------------|--|------------------------------------------------|
| (core-shell)           | (UCNPs)                                                                                                            |                                | ${}^4\text{Nd}^{3+}$ @Sodium-Gluconate                                                                                  | nm<br>$\lambda_{\text{em}} = 525, 540, 656 \text{ nm}$                                             |            |     |     |     |                 |  | 7, 16257-16265 <sup>60</sup>                   |
| Nanoprobe              | Gd <sub>2</sub> O <sub>3</sub> :Yb <sup>3+</sup> , Er <sup>3+</sup> nanorods (up-conversion luminescence material) | Gd <sub>2</sub> O <sub>3</sub> | PEGylated Gd <sub>2</sub> O <sub>3</sub> :Yb <sup>3+</sup> , Er <sup>3+</sup> nanorods (Gd and Yb as CT contrast agent) | $\lambda_{\text{ex}} = 980 \text{ nm}$                                                             | OFI/MRI/CT | N/A | N/A | N/A | N/A             |  | Biomaterials 2013, 34, 1712-1721 <sup>6</sup>  |
| Nanoprobe              | BaGdF <sub>5</sub> :Yb/Er NPs (UCNPs)                                                                              | BaGdF <sub>5</sub>             | PEGylated BaGdF <sub>5</sub> :Yb/Er nanoprobe (Ba, Gd, Yb as CT contrast agent)                                         | $\lambda_{\text{ex}} = 980 \text{ nm}$<br>$\lambda_{\text{em}} = 500-600 \text{ nm}$<br>600-700 nm | OFI/MRI/CT | N/A | N/A | N/A | Splenic disease |  | Biomaterials 2012, 33, 9232-9238 <sup>61</sup> |
| Nanoprobe (core-shell) | NaLuF <sub>4</sub> -based upconversion nanophosphors                                                               | Gd-DTPA                        | NaLuF <sub>4</sub> :Yb <sup>3+</sup> , Tm <sup>3+</sup> @SiO <sub>2</sub> -GdDTPA (Yb, Tm as CT contrast agent)         | $\lambda_{\text{ex}} = 980 \text{ nm}$<br>$\lambda_{\text{em}} = 450-500 \text{ nm}$               | OFI/MRI/CT | N/A | N/A | N/A | N/A             |  | Biomaterials 2012, 33, 5394-5405 <sup>62</sup> |
| Nanoprobe              | Upconversion nanoparticles (UCNPs)                                                                                 | NaGdF <sub>4</sub>             | NaY/GdF <sub>4</sub> : Yb, Er, Tm@SiO <sub>2</sub> -Au@PEG <sub>5000</sub>                                              | $\lambda_{\text{ex}} = 980 \text{ nm}$<br>$\lambda_{\text{em}} = 500-560 \text{ nm}$ & 620-680 nm  | OFI/MRI/CT | N/A | N/A | N/A | Cancer          |  | Biomaterials 2012, 33, 1079-1089 <sup>63</sup> |

**Table S5** Representative OFI/PET dual-modality imaging probes.

| Category | Fluorophore                     | Radioisotope /Chelator                                         | Imaging Agents                                                                           | Fluorescence Imaging Conditions                                          | Imaging Modalities | Targeting Moiety        | Biological Targets                         | Combined Therapy | Disease                     | Reference                                               |
|----------|---------------------------------|----------------------------------------------------------------|------------------------------------------------------------------------------------------|--------------------------------------------------------------------------|--------------------|-------------------------|--------------------------------------------|------------------|-----------------------------|---------------------------------------------------------|
| Antibody | IRDye 800CW                     | <sup>89</sup> Zr-DFO                                           | <sup>89</sup> Zr- <i>N</i> -sucDf-mAb-IRDye800CW                                         | ICG filter                                                               | NIRF/PET           | Cetuximab / bevacizumab | EGFR/VEGF                                  | N/A              | Cancer                      | Nat. Protoc. 2013, 8, 1010-1018 <sup>64</sup>           |
| Antibody | IRDye 800CW/(Fluorescein/CF790) | <sup>64</sup> Cu/ <sup>68</sup> Ga-DOTA                        | mAb7- <sup>64</sup> Cu-DOTA-IRDye 800                                                    | N/A                                                                      | NIRF/PET           | mAb7 (anti-EpCAM mAb)   | Epithelial cell adhesion molecules (EpCAM) | N/A              | Prostate cancer             | J. Med. Chem. 2013, 56, 406-416 <sup>65</sup>           |
| Antibody | IRDye 800CW                     | <sup>64</sup> Cu-DOTA                                          | <sup>64</sup> Cu-(DOTA) <sub>n</sub> -anti-EpCAM-(IRDye 800) <sub>m</sub>                | $\lambda_{ex} = 785 \text{ nm}$<br>$\lambda_{em} = 830 \text{ nm}$       | NIRF/PET           | Anti-EpCAM mAbs         | EpCAM                                      | N/A              | Cancer                      | Prostate 2012, 72, 129-146 <sup>66</sup>                |
| Antibody | IRDye 800CW                     | <sup>64</sup> Cu-DOTA                                          | <sup>64</sup> Cu-(DOTA) <sub>n</sub> -anti-EpCAM-(IRDye 800) <sub>m</sub>                | $\lambda_{ex} = 768 \text{ nm}$<br>$\lambda_{em} = 830 \pm 5 \text{ nm}$ | NIRF/PET/CT        | Anti-EpCAM mAbs         | EpCAM (Metastatic lymph node)              | N/A              | Prostate cancer             | J. Nucl. Med. 2012, 53, 1427-1437 <sup>67</sup>         |
| Antibody | IRDye 800CW                     | <sup>64</sup> Cu-NOTA                                          | <sup>64</sup> Cu-NOTA-TRC105-800CW<br><sup>64</sup> Cu-NOTA-cetuximab-800CW (as control) | $\lambda_{ex} = 778 \text{ nm}$<br>$\lambda_{em} = 806 \text{ nm}$       | NIRF/PET           | TRC105/cetuximab        | CD105/EGFR                                 | N/A              | Breast cancer               | Mol. Pharmaceutics 2012, 9, 645-653 <sup>68</sup>       |
| Antibody | IRDye 800CW                     | <sup>89</sup> Zr-DFO                                           | <sup>89</sup> Zr-Df-TRC105-800CW                                                         | $\lambda_{ex} = 778 \text{ nm}$<br>$\lambda_{em} = 806 \text{ nm}$       | NIRF/PET           | TRC105/cetuximab        | CD105/EGFR                                 | N/A              | Breast cancer               | Mol. Pharmaceutics 2012, 9, 2339-2349 <sup>69</sup>     |
| Antibody | IRDye 800                       | <sup>64</sup> Cu-DOTA                                          | <sup>64</sup> Cu-(DOTA) <sub>n</sub> -Trastuzumab-(IRDye800) <sub>m</sub>                | $\lambda_{ex} = 785 \text{ nm}$                                          | NIRF/PET           | Trastuzumab             | HER-2                                      | N/A              | Breast cancer               | Transl. Oncol. 2010, 3, 307-317 <sup>70</sup>           |
| Antibody | Alexa Fluor 750                 | <sup>64</sup> Cu-DOTA                                          | <sup>64</sup> Cu-DOTA-NuB2-Alexa Fluor 750                                               | Tunable filter 650 to 850 nm                                             | NIRF/PET           | NuB2                    | CD20                                       | N/A              | Lymphoma cancer             | Oncol. Rep. 2009, 22, 115-119 <sup>71</sup>             |
| Antibody | Cy7                             | <sup>18</sup> F (labelled via boron trap)                      | mAb- <sup>18</sup> F-labelled Cy7                                                        | $\lambda_{ex} = 730 \text{ nm}$<br>$\lambda_{em} = 810 \text{ nm}$       | NIRF/PET           | EpCAM/ Cetuximab-1      | Prostate tumor/EGFR                        | N/A              | Cancer                      | Bioconjugate Chem. 2016, 27, 1390-1399 <sup>72</sup>    |
| Antibody | <sup>18</sup> F-BODIPY          | <sup>18</sup> F (labelled via DMAP activation)                 | mAb- <sup>18</sup> F-labelled BODIPY                                                     | N/A                                                                      | OFI/PET            | Trastuzumab             | HER-2                                      | N/A              | Her2 positive breast cancer | Angew. Chem. Int. Ed. 2012, 51, 4603-4606 <sup>73</sup> |
| Peptide  | <sup>18</sup> F-BODIPY          | <sup>18</sup> F (labelled via Lewis acid activation and click) | Bombesin- <sup>18</sup> F-labelled BODIPY                                                | N/A                                                                      | OFI/PET/CT         | Bombesin                | Bombesin receptor                          | N/A              | Prostate cancer             | EJNMMI Res. 2015, 5, 43 <sup>74</sup>                   |



|                                                      |                        |                                                                    |                                                                      |                                                                     |             |                             |                                                                 |     |                 |                                                         |
|------------------------------------------------------|------------------------|--------------------------------------------------------------------|----------------------------------------------------------------------|---------------------------------------------------------------------|-------------|-----------------------------|-----------------------------------------------------------------|-----|-----------------|---------------------------------------------------------|
| Peptide                                              | <sup>18</sup> F-BODIPY | chemistry)<br><sup>18</sup> F (labelled via Lewis acid activation) | RGD- <sup>18</sup> F-labelled BODIPY                                 | N/A                                                                 | OFI/PET     | RGD                         | $\alpha_v\beta_3$ integrin                                      | N/A | Cancer          | Theranostics 2013, 3, 181-189 <sup>75</sup>             |
| Peptide                                              | Sulfo-Cy7              | <sup>68</sup> Ga-FSC                                               | Sulfo-Cy7-FSC-MG<br>Sulfo-Cy7-FSC-RGD                                | $\lambda_{ex} = 730$ nm<br>$\lambda_{em} = 790$ nm                  | NIRF/PET    | Minigastrin analog (MG)/RGD | cholecystokinin-2 (CCK-2) receptor / $\alpha_v\beta_3$ integrin | N/A | Cancer          | Bioconjugate Chem. 2017, 28, 1722-1733 <sup>76</sup>    |
| Peptide (site-specific labeling via click chemistry) | Sulfo-Cy5              | <sup>64</sup> Cu-sarcophagine                                      | <sup>64</sup> Cu-E4-FI                                               | N/A                                                                 | NIRF/PET    | Exendin-4                   | Glucagon-like peptide 1 receptor (GLP-1R)                       | N/A | Cancer          | Bioconjugate Chem. 2014, 25, 1323-1330 <sup>77</sup>    |
| Peptide                                              | Cy5.5                  | <sup>64</sup> Cu-BaAnSar (sarcophagine derivative)                 | <sup>64</sup> Cu-BaAnSar-RGD <sub>2</sub> -Cy5.5                     | Cy5.5 filter                                                        | NIRF/PET    | (RGD) <sub>2</sub>          | $\alpha_v\beta_3$ integrin                                      | N/A | Cancer          | Mol. Imaging Biol. 2012, 14, 718-724 <sup>78</sup>      |
| Peptide, Photo-click chemistry                       | Parazoline             | <sup>68</sup> Ga-NOTA                                              | <sup>68</sup> Ga-NOTA-Parazoline-AE105                               | $\lambda_{ex} = 365$ nm<br>$\lambda_{em} = 570$ nm<br>(605 ± 35 nm) | OFI/PET     | AE105                       | urokinase-type plasminogen activator receptor (uPAR)            | N/A | Cancer          | Bioconjugate Chem. 2016, 27, 1200-1204 <sup>79</sup>    |
| Peptide, BCN-based MSAP platform                     | Cy5.5                  | <sup>64</sup> Cu-NOTA                                              | ( <sup>64</sup> Cu-NOTA)-Cy5.5-BCN-AE105<br>( <sup>64</sup> Cu-CHS1) | Cy5.5 filter                                                        | NIRF/PET    | AE105                       | uPAR                                                            | N/A | Cancer          | Angew. Chem. Int. Ed. 2015, 54, 5981-5984 <sup>80</sup> |
| Peptide, Cysteine-based MSAP platform                | Cy5.5                  | <sup>64</sup> Cu-DOTA                                              | <sup>64</sup> Cu-DOTA-NT-Cy5.5                                       | Cy5.5 filter                                                        | NIRF/PET/CT | Neurotensin (NT)            | G-protein-coupled neurotensin receptor (NTR)                    | N/A | Cancer          | Mol. Pharmaceutics 2015, 12, 3054-3061 <sup>81</sup>    |
| Peptide, Cysteine-based MSAP platform                | ZW-1                   | <sup>64</sup> Cu-DOTA                                              | <sup>64</sup> Cu-RGD-C(DOTA)-ZW-1                                    | $\lambda_{ex} = 775$ nm<br>$\lambda_{em} = 790$ nm                  | NIRF/PET    | c(RGDyK)                    | $\alpha_v\beta_3$ integrin                                      | N/A | Cancer          | Theranostics 2012, 2, 746-756 <sup>82</sup>             |
| Peptide, Lysine-based MSAP platform                  | IRDye 650              | <sup>68</sup> Ga-DOTA                                              | <sup>68</sup> Ga-HZ220                                               | $\lambda_{ex} = 640$ nm<br>$\lambda_{ex} = 680-780$ nm              | NIRF/PET    | RM2 (nonapeptide)           | Gastrin-releasing peptide receptor (GRPR)                       | N/A | Prostate cancer | J. Nucl. Med. 2017, 58, 29-35 <sup>83</sup>             |
| Peptide,                                             | IRDye                  | <sup>68</sup> Ga-DOTA                                              | <sup>68</sup> Ga-MMC (IRDye                                          | N/A                                                                 | NIRF/PET    | TOC                         | Somatostatin                                                    | N/A | Cancer          | ACS Med. Chem. Lett. 2017, 8, 720-                      |

|                                          |               |                                                  |                                                      |                                                            |              |                    |                                                      |     |                                 |                                                      |
|------------------------------------------|---------------|--------------------------------------------------|------------------------------------------------------|------------------------------------------------------------|--------------|--------------------|------------------------------------------------------|-----|---------------------------------|------------------------------------------------------|
| Lysine-based MSAP platform               | 800CW         |                                                  | 800CW)-TOC                                           |                                                            |              | (octapeptide)      | receptor (SSTR)                                      |     |                                 | 725 <sup>84</sup>                                    |
| Lysine-based MSAP platform               | MHI-148 (Cy7) | <sup>64</sup> Cu-DOTA                            | <sup>64</sup> Cu-DOTA-Lys-MHI-148                    | $\lambda_{ex} = 740$ nm<br>$\lambda_{em} = 820$ nm         | NIRF/PET     | MHI-148            | tumor                                                | N/A | Cancer                          | Nucl. Med. Biol. 2013, 40, 351-360 <sup>85</sup>     |
| Nanoprobe (peptides as targeting groups) | QD705         | 2- <sup>18</sup> F-fluoropropionate              | <sup>18</sup> F-FP-QD-RGD-BBN                        | $\lambda_{ex} = 420$ nm<br>$\lambda_{em} = 705$ nm         | NIRF/PET     | RGD-bombesin (BBN) | $\alpha_v\beta_3$ integrin/GRPR                      | N/A | Prostate cancer                 | J. Nucl. Med. 2015, 56, 1278-1284 <sup>86</sup>      |
| Nanoprobe                                | NIR797        | <sup>68</sup> Ga-NOTA                            | <sup>68</sup> Ga-MNP-SiO <sub>2</sub> (NIR797)       | $\lambda_{ex} = 710-760$ nm<br>$\lambda_{em} = 780-950$ nm | NIRF/PET/MRI | N/A                | Sentinel lymph node                                  | N/A | Cancer                          | Nanomedicine 2012, 7, 219-229 <sup>87</sup>          |
| Small Biomolecules                       | BODIPY        | <sup>18</sup> F-BODIPY                           | <sup>18</sup> F-Bodipy-C <sub>16</sub> /triglyceride | $\lambda_{ex} = 460-490$ nm<br>$\lambda_{em} = 510-550$ nm | OFI/PET      | triglyceride       | Human primary adipocyte cells (Brown adipose tissue) | N/A | Obesity                         | PLoS One 2017, 12, e0182297 <sup>88</sup>            |
| Small Biomolecule                        | Cy7           | <sup>18</sup> F (labelled <i>via</i> boron trap) | <sup>18</sup> F-BOMB Lymphoseek                      | $\lambda_{ex} = 755$ nm<br>$\lambda_{em} = 772$ nm         | NIRF/PET     | Lymphoseek         | Sentinel lymph node                                  | N/A | Cancer                          | Bioconjugate Chem. 2010, 21, 1811-1819 <sup>89</sup> |
| Small Molecule                           | Cy5           | <sup>18</sup> F                                  | <sup>18</sup> F-labeled Cy5                          | $\lambda_{ex} = 640$ nm<br>$\lambda_{em} = 700$ nm         | NIRF/PET     | N/A                | N/A                                                  | N/A | Cancer                          | Int. J. Mol. Sci. 2017, 18, 1214 <sup>90</sup>       |
| Small Molecule                           | Fluorescein   | <sup>18</sup> F                                  | <sup>18</sup> F-labeled fluorescein                  | $\lambda_{ex} = 450$ nm<br>$\lambda_{em} = 535$ nm         | OFI/PET      | N/A                | Spontaneous cerebrospinal fluid leaks                | N/A | Trauma (Brain and Spine Damage) | Theranostics 2017, 7, 2377-2391 <sup>91</sup>        |
| Small Molecule                           | BODIPY        | <sup>18</sup> F-BODIPY                           | <sup>18</sup> F-labeled ammonium BODIPY              | $\lambda_{ex} = 488$ nm<br>$\lambda_{em} = 518$ nm         | OFI/PET/CT   | N/A                | N/A                                                  | N/A | Myocardial perfusion            | Chem. Eur. J. 2016, 22, 12122-12129 <sup>92</sup>    |
| Small Molecule                           | Rodamine      | <sup>18</sup> F                                  | <sup>18</sup> F-labeled Rodamine                     | N/A                                                        | OFI/PET      | N/A                | N/A                                                  | N/A | Myocardial perfusion            | Nucl. Med. Biol. 2015, 42, 796-803 <sup>93</sup>     |
| Small Molecule                           | BODIPY        | <sup>18</sup> F-BODIPY                           | <sup>18</sup> F-labeled BODIPY                       | N/A                                                        | OFI/PET      | N/A                | N/A                                                  | N/A | Myocardial perfusion            | Nucl. Med. Biol. 2014, 41, 120-126 <sup>94</sup>     |

**Table S6** Representative OFI/SPECT dual-modality imaging probes.

| Category                                   | Fluorophore | Radioisotope/<br>Chelator                       | Imaging Agents                                                                            | Fluorescence<br>Imaging<br>Conditions                                  | Imaging<br>Modalities | Targeting Moiety           | Biological Targets<br>of Interest                         | Combined<br>Therapy | Disease           | Reference                                                                                                                                |
|--------------------------------------------|-------------|-------------------------------------------------|-------------------------------------------------------------------------------------------|------------------------------------------------------------------------|-----------------------|----------------------------|-----------------------------------------------------------|---------------------|-------------------|------------------------------------------------------------------------------------------------------------------------------------------|
| Antibody                                   | IRDye800CW  | <sup>111</sup> In-DTPA                          | <sup>111</sup> In-DTPA-labetuzumab-IRDye800CW                                             | $\lambda_{ex} = 745$ nm<br>$\lambda_{em} = 810-885$ nm<br>(ICG filter) | NIRF/SPECT            | Labetuzumab (mAb)          | carcinoembryonic antigen (CEA) expressing micrometastases | N/A                 | Colorectal cancer | J. Nucl. Med. 2017, 58, 706-710 <sup>95</sup>                                                                                            |
| Antibody                                   | IRDye800CW  | <sup>111</sup> In-DTPA                          | <sup>111</sup> In-DTPA-MN-14-IRDye800CW                                                   | $\lambda_{ex} = 745$ nm<br>$\lambda_{em} = 810-885$ nm<br>(ICG)        | NIRF/SPECT            | MN-14 (mAb)                | carcinoembryonic antigen (CEA)                            | N/A                 | Colorectal cancer | J. Nucl. Med. 2014, 55, 1519-1524 <sup>96</sup>                                                                                          |
| Antibody                                   | IRDye800CW  | <sup>111</sup> In-DTPA                          | <sup>111</sup> In-DTPA-D2B-IRDye800CW                                                     | N/A                                                                    | NIRF/SPECT            | D2B (mAb)                  | Prostate-specific membrane antigen (PSMA)                 | N/A                 | Prostate cancer   | J. Nucl. Med. 2014, 55, 995-1001 <sup>97</sup>                                                                                           |
| Antibody                                   | IRDye800CW  | <sup>111</sup> In-DTPA                          | <sup>111</sup> In-DTPA-G250-IRDye800CW                                                    | N/A                                                                    | NIRF/SPECT            | G250 (mAb)                 | CAIX expressing tumor                                     | N/A                 | Renal tumor       | J. Urol. 2015, 194, 532-538 <sup>98</sup>                                                                                                |
| Antibody                                   | ZW800-1     | <sup>111</sup> In-DTPA                          | <sup>111</sup> In-DTPA-Lys(ZW800)-Cys-ATN-658                                             | $\lambda_{ex} = 773$ nm<br>$\lambda_{em} = 790$ nm<br>(ZW800-1)        | NIRF/SPECT            | ATN-658 (mAb)              | Urokinase-type plasminogen activator receptor (uPAR)      | N/A                 | cancer            | Oncotarget 2014, 6, 14260-14273 <sup>99</sup>                                                                                            |
| Antibody,<br>Lysine-based<br>MSAP platform | Cy5.5 / Cy7 | <sup>111</sup> In-SMCC                          | trastuzumab-Cy5.5-SMCC<br>cetuximab-Cy7-SMCC                                              | N/A                                                                    | NIRF/PET              | Trastuzumab /<br>cetuximab | HER-2/EGFR                                                | N/A                 | cancer            | Bioorg. Med. Chem. 2009, 17, 5176-5181 <sup>100</sup>                                                                                    |
| Lysine-based<br>MSAP platform              | IRDye800CW  | <sup>99m</sup> Tc/Re-MAS <sub>3</sub>           | Pam-Tc/Re-800<br>(lysine as linker)                                                       | N/A                                                                    | NIRF/SPECT/CT         | Bisphosphonates            | Breast cancer<br>microcalcification                       | N/A                 | Breast cancer     | J. Am. Chem. Soc. 2008, 130, 17648-17649 <sup>101</sup>                                                                                  |
| Lysine-based<br>MSAP platform              | Cy5.5       | <sup>111</sup> In-DTPA                          | <sup>111</sup> In-MSAP-RGD                                                                | $\lambda_{ex} = 615-665$ nm<br>$\lambda_{em} = 695-770$ nm             | NIRF/SPECT            | RGD (peptide)              | $\alpha_v\beta_3$ integrin<br>expressing cancer           | N/A                 | Cancer            | ChemBioChem 2012, 13, 1039-1045 <sup>102</sup>                                                                                           |
| Lysine-based<br>MSAP platform              | Cy5.5       | <sup>111</sup> In-DOPA                          | <sup>111</sup> In-DOPA-Cy5.5-PEG <sub>5000</sub> -<br>RGD<br>(lysine as linker)           | N/A                                                                    | NIRF/SPECT            | RGD (peptide)              | $\alpha_v\beta_3$ integrin<br>expressing cancer           | N/A                 | Cancer            | PLoS One 2013, 8, e58290 <sup>103</sup>                                                                                                  |
| Lysine-based<br>MSAP platform              | Cy7         | <sup>99m</sup> Tc-nicotinic<br>acid and tricine | <sup>99m</sup> Tc-PC-1007<br>(lysine as linker)                                           | $\lambda_{ex} = 745$ nm<br>$\lambda_{em} = 820$ nm                     | NIRF/SPECT            | Cy7                        | Cancer                                                    | N/A                 | Cancer            | Bioorg. Med. Chem. Lett. 2013, 23, 6350-6354 <sup>104</sup>                                                                              |
| Lysine-based<br>MSAP platform              | IR783       | <sup>111</sup> In-DOTA                          | <sup>111</sup> In-DOTA-Lys(PEG)-Cys-<br>IR783                                             | $\lambda_{ex} = 561$ nm<br>$\lambda_{em} =$ mCherry<br>filter          | NIRF/SPECT            | N/A                        | N/A                                                       | N/A                 | Cancer            | PLoS One 2014, 9, e95406 <sup>105</sup>                                                                                                  |
| Lysine-based<br>MSAP platform              | Cy5.5       | <sup>99m</sup> Tc-HYNIC                         | Avidin preinjection<br><sup>99m</sup> Tc-HYNIC-lysine(Cy5.5)-<br>PEG <sub>4</sub> -biotin | N/A                                                                    | NIRF/SPECT            | biotin                     | Avidin pretargeted<br>cancer cells                        | N/A                 | Cancer            | Sci. Rep. 2016, 6, 18905 <sup>106</sup>                                                                                                  |
| nanoprobe                                  | ICG         | <sup>99m</sup> Tc-albumin<br>colloid            | ICG- <sup>99m</sup> Tc-nanocolloid                                                        | Handheld NIRF<br>fluorescence<br>camera                                | NIRF/SPECT            | N/A                        | Sentinel lymph<br>node                                    | N/A                 | Cancer            | Eur. J. Nucl. Med. Mol. Imaging 2016, 43, 1857-1867 <sup>107</sup><br>Eur. J. Nucl. Med. Mol. Imaging 2015, 42, 1631-1638 <sup>108</sup> |

|                                |                                       |                                                   |                                                                                              |                                                                                               |                      |                           |                                                     |     |                                            |                                                                                                                     |
|--------------------------------|---------------------------------------|---------------------------------------------------|----------------------------------------------------------------------------------------------|-----------------------------------------------------------------------------------------------|----------------------|---------------------------|-----------------------------------------------------|-----|--------------------------------------------|---------------------------------------------------------------------------------------------------------------------|
| nanoprobe                      | ICG                                   | $^{177}\text{Lu}$ -DOTA                           | ICG@DPDCs- $^{177}\text{Lu}$<br>(cerasome nanoparticles)                                     | $\lambda_{\text{ex}} = 745 \text{ nm}$<br>$\lambda_{\text{em}} = 820 \text{ nm}$              | NIRF/SPECT/CT        | N/A                       | (Lewis lung carcinoma)                              | PTT | Cancer                                     | J. Nucl. Med. 2012, 53, 1034-1040 <sup>109</sup><br>ACS Appl. Mater. Interfaces 2015, 7, 22095-22105 <sup>110</sup> |
| nanoprobe                      | Alexa 647                             | $^{111}\text{In}$ /Gd-DOTA                        | $^{111}\text{In}$ /Gd-DOTA @HPG<br>(polymer nanoparticles)                                   | N/A                                                                                           | OFI/SPECT/MRI        | N/A                       | Tumor vascular structure                            | N/A | Cancer                                     | Bioconjugate Chem. 2012, 23, 372-381 <sup>111</sup>                                                                 |
| nanoprobe                      | Fluorescein                           | $^{111}\text{In}$ /Gd-DOTA                        | Multimodal liposomes                                                                         | N/A                                                                                           | OFI/SPECT/MRI        | N/A                       | (biodistribution)                                   | N/A | N/A                                        | Biomaterials 2013, 34, 1179-1192 <sup>112</sup>                                                                     |
| nanoprobe                      | Cy7                                   | $^{111}\text{In}$ -DTPA                           | Annexin A5-CCPM<br>polymeric micelles                                                        | N/A                                                                                           | NIRF/SPECT/CT        | Annexin A5<br>(protein)   | Phosphatidylserine<br>on dying cells<br>(apoptosis) | N/A | Cancer/<br>Hepatic<br>apoptosis            | J. Nucl. Med. 2011, 52, 958-964 <sup>113</sup><br>Mol. Imaging 2013, 12, 182-190 <sup>114</sup>                     |
| nanoprobe                      | $\text{YPO}_4$ NPs                    | $^{111}\text{InCl}_3$                             | PEG- $^{111}\text{In}$ - $\text{YPO}_4$ NPs                                                  | $\lambda_{\text{ex}} = 980 \text{ nm}$<br>$\lambda_{\text{em}} = 1000\text{-}1350 \text{ nm}$ | OTN-<br>NIR/SPECT/CT | N/A                       | N/A                                                 | N/A | N/A                                        | J. Photopolym. Sci. Technol. 2016, 29, 525-532 <sup>115</sup>                                                       |
| Small<br>biomolecules<br>(RNA) | Alexa Fluor 633                       | $^{99\text{m}}\text{Tc}$ -MAG3                    | $^{99\text{m}}\text{Tc}$ and Alexa Fluor 633<br>labelled 28S fungal rRNA-<br>targeted MORF   | N/A                                                                                           | OFI/SPECT/CT         | Sequence-specific<br>MORF | 28S rRNA gene of<br>Aspergillus                     | N/A | Fungal<br>infection                        | Nucl. Med. Biol. 2013, 40, 89-96 <sup>116</sup>                                                                     |
| Small<br>biomolecules<br>(LPS) | BODIPY                                | $^{111}\text{In}$ -DOTA                           | $^{111}\text{In}$ -DOTA-Bodipy-LPS                                                           | $\lambda_{\text{ex}} = 514 \text{ nm}$<br>$\lambda_{\text{em}} = 537\text{-}600 \text{ nm}$   | OFI/SPECT/CT         | LPS                       | Hepatocytes and<br>Kupffer cells in<br>liver        | N/A | Gram-<br>negative<br>bacteria<br>infection | ACS Chem. Biol. 2014, 9, 656-662 <sup>117</sup>                                                                     |
| Small<br>biomolecules<br>(RGD) | CdTe QDs                              | $^{188}\text{Re}(\text{His})(\text{CO})_3$        | $^{188}\text{Re}$ -HGRGD(D)F-CdTe<br>QDs                                                     | N/A                                                                                           | NIRF/SPECT           | RGD (peptide)             | $\alpha_v\beta_3$ integrin<br>expressing cancer     | N/A | Cancer                                     | Talanta 2011, 85, 936-942 <sup>118</sup>                                                                            |
| Small molecule                 | $\text{Re}(\text{pyta})(\text{CO})_3$ | $^{99\text{m}}\text{Tc}(\text{IDA})(\text{CO})_3$ | $\text{Re}(\text{pyta})(\text{CO})_3$ -<br>$^{99\text{m}}\text{Tc}(\text{IDA})(\text{CO})_3$ | $\lambda_{\text{ex}} = 321 \text{ nm}$<br>$\lambda_{\text{em}} = 496 \text{ nm}$              | OFI/SPECT            | N/A                       | N/A                                                 | N/A | N/A                                        | Dalton Trans. 2014, 43, 439-450 <sup>119</sup>                                                                      |

**Table S7** Representative OFI/PAI dual-modality imaging probes.

| Category                      | Fluorophore            | Photoacoustic contrast agent    | Imaging Agents                                                        | Imaging Conditions                                                                                                                   | Imaging Modalities | Targeting Moiety                                         | Biological Targets          | Combined Therapy                   | Disease                                  | Reference                                                       |
|-------------------------------|------------------------|---------------------------------|-----------------------------------------------------------------------|--------------------------------------------------------------------------------------------------------------------------------------|--------------------|----------------------------------------------------------|-----------------------------|------------------------------------|------------------------------------------|-----------------------------------------------------------------|
| Nanoprobe (core-shell)        | ICG                    | Au Nanorods                     | Au@liposome-ICG                                                       | $\lambda_{ex} = 745$ nm<br>$\lambda_{em} = 840$ nm<br>$\lambda_{ex} = 780$ nm (MSOT)                                                 | NIRF/MSOT          | (EPR effect)                                             | cancer                      | PTT                                | Liver cancer                             | Bioconjugate Chem. 2017, 28, 1221-1228 <sup>120</sup>           |
| Nanoprobe (core-shell)        | ICG                    | Au Nanorods                     | ICG-loaded Au@SiO <sub>2</sub>                                        | $\lambda_{ex} = 745$ nm<br>$\lambda_{em} = 800$ nm<br>$\lambda_{ex} = 680-960$ nm (MSOT)                                             | NIRF/MSOT          | N/A                                                      | N/A                         | N/A                                | Cancer, Leg ischemia of diabetic disease | Nanoscale 2016, 8, 14480-14488 <sup>121</sup>                   |
| Nanoprobe (core-shell)        | NIR-797                | Au Nanorods                     | double-labeled NIR-liposome-AuNR hybrids                              | $\lambda_{ex} = 700-900$ nm (MSOT)                                                                                                   | NIRF/MSOT          | N/A                                                      | N/A                         | N/A                                | Cancer                                   | J. Am. Chem. Soc. 2012, 134, 13256-13258 <sup>122</sup>         |
| Nanoprobe (core-shell)        | QDs                    | Au Nanorods                     | Au NRs@SiO <sub>2</sub> -QDs-Ad/CD-PGEA (Au NRs as CT contrast agent) | $\lambda_{em} \approx 690$ nm                                                                                                        | NIRF/PAI/CT        | N/A                                                      | N/A                         | PTT<br>Chemotherapy<br>Genetherapy | Cancer                                   | Small 2017, 13, 1603133 <sup>123</sup>                          |
| Nanoprobe (core-shell)        | ICG                    | Ag NPs                          | ICG-Ag@PANI                                                           | $\lambda_{ex} = 704$ nm<br>$\lambda_{em} = 735$ nm                                                                                   | NIRF/PAI           | (EPR effect)                                             | cancer                      | PTT<br>PDT                         | Cancer                                   | ACS Appl. Mater. Interfaces 2016, 8, 34991-35003 <sup>124</sup> |
| Nanoprobe (core-shell)        | Cy5.5                  | IR825                           | PFOB@IR825-HA-Cy5.5 (PFOB as X-ray contrast agent)                    | $\lambda_{ex} = 640$ nm<br>$\lambda_{em} = 650-800$ nm                                                                               | OFI/PAI/CT         | Hyaluronic acid (HA)                                     | Hyaluronidases in the tumor | PTT                                | Cancer                                   | Biomaterial 2017, 132, 72-84 <sup>125</sup>                     |
| Nanoprobe                     | NIR-830                | Iron oxide nanoparticles (IONP) | NIR-830-Z <sub>HER2:342</sub> -IONP<br>NIR-830-BSA-IONP               | $\lambda_{ex} = 797$ nm<br>$\lambda_{em} = 830$ nm                                                                                   | OFI/PAI            | Z <sub>HER2:342</sub> (a 58 amino acid scaffold protein) | HER-2                       | N/A                                | Cancer                                   | Nanomedicine 2014, 10, 669-677 <sup>126</sup>                   |
| Nanoprobe (core-shell)        | Cypat-C18 or PPCy-C8   | Cypat-C18 or PPCy-C8            | Dye-liposome@perfluorocarbon                                          | $\lambda_{ex} = 700$ nm<br>$\lambda_{em} = 775$ nm                                                                                   | NIRF/PAI           | N/A                                                      | Sentinel lymph node         | PTT                                | Cancer metathesis                        | ACS Nano 2011, 5, 173-182 <sup>127</sup>                        |
| Nanoprobe                     | Chlorin e6             | SWCNT                           | Ce6@Albumin-EB@SWCNT                                                  | $\lambda_{ex} = 670$ nm (NIRF)<br>$\lambda_{ex} = 808$ nm (PA&PTT)<br>$\lambda_{ex} = 630$ nm (PDT)<br>$\lambda_{ex} = 500$ nm (OFI) | NIRF/PAI           | N/A                                                      | N/A                         | PTT<br>PDT                         | Cancer                                   | Biomaterial 2016, 103, 219-228 <sup>128</sup>                   |
| Nanoprobe                     | Dox                    | Hollow gold nanoshells (HAuNS)  | Dox@PEG-HAuNS                                                         | $\lambda_{em} = 600$ nm<br>$\lambda_{ex} = 800$ nm (PAI)                                                                             | OFI/PAI            | N/A                                                      | N/A                         | PTT                                | Cancer                                   | J. Controlled Release 2013, 172, 152-158 <sup>129</sup>         |
| Nanoprobe (PEGlyated NIR dye) | CR780 (croconaine dye) | CR780                           | CR780-PEG5K                                                           | $\lambda_{ex} = 633$ nm (NIRF)<br>$\lambda_{ex} = 808$ nm (PTT)                                                                      | NIRF/PAI           | N/A                                                      | N/A                         | PTT                                | Cancer                                   | Biomaterial 2017, 129, 28-36 <sup>130</sup>                     |
| Nanoprobe (PEGlyated NIR dye) | TBD (a BODIPY dimer)   | TBD                             | PEGylated TBD                                                         | $\lambda_{ex} = 740$ nm (NIRF)<br>$\lambda_{em} = 820$ nm<br>$\lambda_{ex} = 790$ nm (PAI)                                           | NIRF/PAI           | N/A                                                      | N/A                         | N/A                                | Cancer                                   | Biomacromolecules 2017, 18, 249-256 <sup>131</sup>              |
| Nanoprobe                     | ICG                    | ICG                             | rNGO-PEG/ICG                                                          | $\lambda_{ex} = 633$ nm (NIRF)<br>$\lambda_{ex} = 780$ nm (PAI)                                                                      | NIRF/PAI           | N/A                                                      | N/A                         | N/A                                | Cancer                                   | Nanoscale Res. Lett. 2016, 11, 85 <sup>132</sup>                |

|                |                       |                 |                                     |                                                                                                                                                                  |           |                                                    |                                         |                    |                              |                                                    |
|----------------|-----------------------|-----------------|-------------------------------------|------------------------------------------------------------------------------------------------------------------------------------------------------------------|-----------|----------------------------------------------------|-----------------------------------------|--------------------|------------------------------|----------------------------------------------------|
| Nanoprobe      | ICG                   | ICG             | Liposomal ICG                       | $\lambda_{em} = 800 \text{ nm}$<br>$\lambda_{ex} = 720\text{-}860 \text{ nm}$ (MSOT)                                                                             | NIRF/MSOT | N/A                                                | N/A                                     | N/A                | Breast cancer                | Eur. Radiol. 2016, 26, 1843-1851 <sup>133</sup>    |
| Nanoprobe      | ICG                   | ICG             | PEGylated liposomal ICG             | $\lambda_{ex} = 745 \text{ nm}$ (NIRF)<br>$\lambda_{em} = 810\text{-}875 \text{ nm}$<br>$\lambda_{ex} = 680\text{-}900 \text{ nm}$ (MSOT)                        | NIRF/MSOT | N/A                                                | N/A                                     | N/A                | Cancer                       | Biomaterial 2015, 37, 415-424 <sup>134</sup>       |
| Antibody       | ICG                   | ICG             | Targeted PEGylated liposome-ICG-DOX | $\lambda_{ex} = 780 \text{ nm}$ (NIRF)<br>$\lambda_{em} = 810 \text{ nm}$<br>$\lambda_{ex} = 680\text{-}900 \text{ nm}$ (MSOT)                                   | NIRF/MSOT | hCTM01 (antibody)                                  | MUC-1                                   | Chemotherapy (DOX) | Cancer                       | Int. J. Pharm. 2015, 482, 2-10 <sup>135</sup>      |
| Antibody       | Fluorescein           | BHQ3            | BHQ3-Fluorescein Trastuzumab        | $\lambda_{ex} = 700 \text{ nm}$ (PAI)<br>$\lambda_{ex} = 445\text{-}490 \text{ nm}$<br>$\lambda_{em} > 515 \text{ nm}$<br>$\lambda_{ex} = 784 \text{ nm}$ (NIRF) | OFT/PAI   | trastuzumab                                        | Her2                                    | N/A                | Cancer                       | Mol. Imaging 2014, 13, 1-9 <sup>136</sup>          |
| Small molecule | ICG                   | ICG             | ICG                                 | $\lambda_{em} = 830 \text{ nm}$<br>$\lambda_{em} = 618, 668 \text{ nm}$                                                                                          | NIRF/MOST | N/A                                                | Sentinel lymph nodes                    | N/A                | Cancer metastasis            | Radiology 2010, 255, 442-450 <sup>137</sup>        |
| Small molecule | CDnir7                | CDnir7          | CDnir7                              | $\lambda_{ex} = 900 \text{ nm}$ (PA)                                                                                                                             | NIRF/MSOT | CDnir7                                             | microphages                             | N/A                | Inflammation                 | Chem. Commun. 2014, 50, 6589-6591 <sup>138</sup>   |
| Small molecule | Cy7-derived dye       | Cy7-derived dye | Cy7-NMDAR targeting group           | $\lambda_{ex} = 750 \text{ nm}$ (NIRF)<br>$\lambda_{em} = 780 \text{ nm}$<br>$\lambda_{ex} = 700\text{-}900 \text{ nm}$ (MSOT)                                   | NIRF/MSOT | Competitive or noncompetitive antagonists of NMDAR | N-methyl-D-aspartate receptors (NMDARs) | N/A                | Neuropsychiatric pathologies | Chem. Commun. 2015, 51, 15149-15152 <sup>139</sup> |
| Small molecule | Usq (a squaraine dye) | Usq             | Usq                                 | $\lambda_{ex} = 675 \pm 15 \text{ nm}$ (NIRF)<br>$\lambda_{em} = 700 \pm 10 \text{ nm}$<br>$\lambda_{ex} = 680 \text{ nm}$ (MSOT)                                | NIRF/MSOT | Squaraine dye as Michael acceptor                  | Blood aminothiols                       | N/A                | N/A                          | Chem. Sci. 2016, 7, 4110-4116 <sup>140</sup>       |

## References:

- [1] James ML, Gambhir SS. A molecular imaging primer: modalities, imaging agents, and applications[J]. *Physiol. Rev.*, 2012, 92:897-965.
- [2] Chen YL, Wang SY, Liu RS, et al. Remnant living cells that escape cell loss in late-stage tumors exhibit cancer stem cell-like characteristics[J]. *Cell Death & Disease*, 2012, 3
- [3] Lu Y-C, Yang C-X, Yan X-P. Radiopaque tantalum oxide coated persistent luminescent nanoparticles as multimodal probes for in vivo near-infrared luminescence and computed tomography bioimaging[J]. *Nanoscale*, 2015, 7:17929-17937.
- [4] Chen J, Yang X-Q, Meng Y-Z, et al. Reverse microemulsion-mediated synthesis of Bi2S3-QD@SiO2-PEG for dual modal CT-fluorescence imaging in vitro and in vivo[J]. *Chem. Commun.*, 2013, 49:11800-11802.
- [5] Qin M-Y, Yang X-Q, Wang K, et al. In vivo cancer targeting and fluorescence-CT dual-mode imaging with nanoprobe based on silver sulfide quantum dots and iodinated oil[J]. *Nanoscale*, 2015, 7:19484-19492.
- [6] Liu Z, Pu F, Huang S, et al. Long-circulating Gd2O3:Yb3+, Er3+ up-conversion nanoprobe as high-performance contrast agents for multi-modality imaging[J]. *Biomaterials*, 2013, 34:1712-1721.
- [7] Zhou Z, Chen H, Lipowska M, et al. A dual-modal magnetic nanoparticle probe for preoperative and intraoperative mapping of sentinel lymph nodes by magnetic resonance and near infrared fluorescence imaging[J]. *J. Biomater. Appl.*, 2013, 28:100-111, 112.
- [8] Liu Y, Tian G-F, He X-W, et al. Microwave-assisted one-step rapid synthesis of near-infrared gold nanoclusters for NIRF/CT dual-modal bioimaging[J]. *J. Mater. Chem. B*, 2016, 4:1276-1283.
- [9] Xia H-X, Yang X-Q, Song J-T, et al. Folic acid-conjugated silica-coated gold nanorods and quantum dots for dual-modality CT and fluorescence imaging and photothermal therapy[J]. *J. Mater. Chem. B*, 2014, 2:1945-1953.

- [10] Zhang J, Li C, Zhang X, et al. In vivo tumor-targeted dual-modal fluorescence/CT imaging using a nanoprobe co-loaded with an aggregation-induced emission dye and gold nanoparticles[J]. *Biomaterials*, 2015, 42:103-111.
- [11] Zhu F-P, Chen G-T, Wang S-J, et al. Dual-modality imaging probes with high magnetic relaxivity and near-infrared fluorescence based highly aminated mesoporous silica nanoparticles[J]. *J. Nanomater.*, 2016:6502127.
- [12] Gao A, Zhang D, Yin X-B. Near infrared fluorescence-magnetic resonance dual-modal imaging with Cy5-labeled, Gd-Al co-doped mesoporous silica nanoparticles[J]. *Anal. Methods*, 2016, 8:214-221.
- [13] Zhang D, Gao A, Xu Y, et al. Gd-Al co-doped mesoporous silica nanoparticles loaded with Ru(bpy)<sub>3</sub><sup>2+</sup> as a dual-modality probe for fluorescence and magnetic resonance imaging[J]. *Analyst (Cambridge, U. K.)*, 2014, 139:4613-4619.
- [14] Abdulkayum A, Yang C-X, Zhao Q, et al. Gadolinium Complexes Functionalized Persistent Luminescent Nanoparticles as a Multimodal Probe for Near-Infrared Luminescence and Magnetic Resonance Imaging in Vivo[J]. *Anal. Chem.*, 2014, 86:4096-4101.
- [15] Zhang Y, Das GK, Vijayaragavan V, et al. "Smart" theranostic lanthanide nanoprobe with simultaneous up-conversion fluorescence and tunable T1-T2 magnetic resonance imaging contrast and near-infrared activated photodynamic therapy[J]. *Nanoscale*, 2014, 6:12609-12617.
- [16] Pan Y, Yang J, Fang Y, et al. One-pot synthesis of gadolinium-doped carbon quantum dots for high-performance multimodal bioimaging[J]. *J. Mater. Chem. B*, 2017, 5:92-101.
- [17] Shi Y, Pan Y, Zhong J, et al. Facile synthesis of gadolinium (III) chelates functionalized carbon quantum dots for fluorescence and magnetic resonance dual-modal bioimaging[J]. *Carbon*, 2015, 93:742-750.
- [18] Chen F, Chen M, Yang C, et al. Terbium-doped gadolinium oxide nanoparticles prepared by laser ablation in liquid for use as a fluorescence and magnetic resonance imaging dual-modal contrast agent[J]. *Phys. Chem. Chem. Phys.*, 2015, 17:1189-1196.
- [19] Hu H, Sheng Y, Ye M, et al. A porphyrin-based magnetic and fluorescent dual-modal nanoprobe for tumor imaging[J]. *Polymer*, 2016, 88:94-101.
- [20] Liu J, Li K, Geng J, et al. Single molecular hyperbranched nanoprobe for fluorescence and magnetic resonance dual modal imaging[J]. *Polym. Chem.*, 2013, 4:1517-1524.
- [21] Xu H, Regino CAS, Koyama Y, et al. Preparation and Preliminary Evaluation of a Biotin-Targeted, Lectin-Targeted Dendrimer-Based Probe for Dual-Modality Magnetic Resonance and Fluorescence Imaging[J]. *Bioconjugate Chem.*, 2007, 18:1474-1482.
- [22] Li K, Ding D, Huo D, et al. Conjugated Polymer Based Nanoparticles as Dual-Modal Probes for Targeted In Vivo Fluorescence and Magnetic Resonance Imaging[J]. *Adv. Funct. Mater.*, 2012, 22:3107-3115, S3107/3101-S3107/3107.
- [23] Gao GH, Heo H, Lee JH, et al. An acidic pH-triggered polymeric micelle for dual-modality MR and optical imaging[J]. *J. Mater. Chem.*, 2010, 20:5454-5461.
- [24] Bumb A, Regino CAS, Perkins MR, et al. Preparation and characterization of a magnetic and optical dual-modality molecular probe[J]. *Nanotechnology*, 2010, 21:175704/175701-175704/175709.
- [25] Gianella A, Jarzyna PA, Mani V, et al. Multifunctional nanoemulsion platform for imaging guided therapy evaluated in experimental cancer[J]. *ACS Nano*, 2011, 5:4422-4433.
- [26] Chen Y-C, Wen S, Shang S-A, et al. Magnetic resonance and near-infrared imaging using a novel dual-modality nano-probe for dendritic cell tracking in vivo[J]. *Cytotherapy*, 2014, 16:699-710.
- [27] Chen O, Riedemann L, Etoc F, et al. Magneto-fluorescent core-shell supernanoparticles[J]. *Nat. Commun.*, 2014, 5:5093.
- [28] Wang F, Chen Z, Zhu L. cRGD-conjugated magnetic-fluorescent liposomes for targeted dual-modality imaging of bone metastasis from prostate cancer[J]. *J. Liposome Res.*, 2015, 25:89-100.
- [29] Yin C, Hong B, Gong Z, et al. Fluorescent oligo(p-phenyleneethynylene) contained amphiphiles-encapsulated magnetic nanoparticles for targeted magnetic resonance and two-photon optical imaging in vitro and in vivo[J]. *Nanoscale*, 2015, 7:8907-8919.
- [30] Yang HY, Jang M-S, Li Y, et al. Multifunctional and Redox-Responsive Self-Assembled Magnetic Nanovectors for Protein Delivery and Dual-Modal Imaging[J]. *ACS Appl. Mater. Interfaces*, 2017, 9:19184-19192.
- [31] Yan XJ, Song XY, Wang ZB. Construction of specific magnetic resonance imaging/optical dual-modality molecular probe used for imaging angiogenesis of gastric cancer[J]. *Artificial Cells Nanomedicine and Biotechnology*, 2017, 45:399-403.
- [32] Qiao H, Wang Y, Zhang R, et al. MRI/optical dual-modality imaging of vulnerable atherosclerotic plaque with an osteopontin-targeted probe based on Fe<sub>3</sub>O<sub>4</sub> nanoparticles[J]. *Biomaterials*, 2017, 112:336-345.
- [33] Chen Q, Shang W, Zeng C, et al. Theranostic imaging of liver cancer using targeted optical/MRI dual-modal probes[J]. *Oncotarget*, 2017, 8:32741-32751.
- [34] Fan Z, Senapati D, Singh AK, et al. Theranostic magnetic core-plasmonic shell star shape nanoparticle for the isolation of targeted rare tumor cells from whole blood, fluorescence imaging, and photothermal destruction of cancer[J]. *Mol. Pharm.*, 2013, 10:857-866.
- [35] Ding K, Liu C, Hou Y, et al. Magnetically engineered Cd-free quantum dots as dual-modality probes for fluorescence/magnetic resonance imaging of tumors[J]. *Biomaterials*, 2014, 35:1608-1617.
- [36] Guo C, Xu M, Xu S, et al. Multifunctional nanoprobe for both fluorescence and <sup>19</sup>F magnetic resonance imaging[J]. *Nanoscale*, 2017, 9:7163-7168.

- [37] Nakamura T, Sugihara F, Matsushita H, et al. Mesoporous silica nanoparticles for  $^{19}\text{F}$  magnetic resonance imaging, fluorescence imaging, and drug delivery[J]. *Chem. Sci.*, 2015, 6:1986-1990.
- [38] Goswami LN, Khan AA, Jalisatgi SS, et al. Synthesis and in vitro assessment of a bifunctional closomer probe for fluorine ( $^{19}\text{F}$ ) magnetic resonance and optical bimodal cellular imaging[J]. *Chem. Commun.*, 2014, 50:5793-5795.
- [39] Wang X-Y, Ju S, Li C, et al. Non-invasive imaging of endothelial progenitor cells in tumor neovascularization using a novel dual-modality paramagnetic/near-infrared fluorescence probe[J]. *PLoS One*, 2012, 7:e50575.
- [40] Ju S, Qiu Y, Li C, et al. Multimodality Imaging of Endothelial Progenitor Cells with a Novel Multifunctional Probe Featuring Positive Magnetic Resonance Contrast and Near-Infrared Fluorescence[J]. *Mol. Imaging*, 2011, 10:359-369.
- [41] Harrison VSR, Carney CE, MacRenaris KW, et al. Multimeric near IR-MR contrast agent for multimodal in vivo imaging[J]. *J. Am. Chem. Soc.*, 2015, 137:9108-9116.
- [42] Yamane T, Hanaoka K, Muramatsu Y, et al. Method for enhancing cell penetration of  $\text{Gd}^{3+}$ -based MRI contrast agents by conjugation with hydrophobic fluorescent dyes[J]. *Bioconjugate Chem.*, 2011, 22:2227-2236.
- [43] Guo K, Berezin MY, Zheng J, et al. Near infrared-fluorescent and magnetic resonance imaging molecular probe with high  $T_1$  relaxivity for in vivo multimodal imaging[J]. *Chemical Communications*, 2010, 46:3705-3707.
- [44] Mishra A, Mishra R, Gottschalk S, et al. Microscopic Visualization of Metabotropic Glutamate Receptors on the Surface of Living Cells Using Bifunctional Magnetic Resonance Imaging Probes[J]. *Acs Chem. Neurosci.*, 2014, 5:128-137.
- [45] You Y, Tomat E, Hwang K, et al. Manganese displacement from Zinpyr-1 allows zinc detection by fluorescence microscopy and magnetic resonance imaging[J]. *Chem. Commun. (Cambridge, U. K.)*, 2010, 46:4139-4141.
- [46] Dong D, Jing X, Zhang X, et al. Gadolinium(III)-fluorescein complex as a dual modal probe for MRI and fluorescence zinc sensing[J]. *Tetrahedron*, 2012, 68:306-310.
- [47] Wang Y, Song R, Feng H, et al. Visualization of Fluoride Ions In Vivo Using a Gadolinium(III)-Coumarin Complex-Based Fluorescence/MRI Dual-Modal Probe[J]. *Sensors*, 2016, 16
- [48] Wang Y, Song R, Guo K, et al. A gadolinium(III) complex based dual-modal probe for MRI and fluorescence sensing of fluoride ions in aqueous medium and in vivo[J]. *Dalton Trans.*, 2016, 45:17616-17623.
- [49] Du T, Zhao C, Rehman FU, et al. In Situ Multimodality Imaging of Cancerous Cells Based on a Selective Performance of  $\text{Fe}^{2+}$ -Adsorbed Zeolitic Imidazolate Framework-8[J]. *Advanced Functional Materials*, 2017, 27
- [50] Liu X, Jiang H, Ye J, et al. Nitrogen-doped carbon quantum dot stabilized magnetic iron oxide nanoprobe for fluorescence, magnetic resonance, and computed tomography triple-modal in vivo bioimaging[J]. *Adv. Funct. Mater.*, 2016, 26:8694-8706.
- [51] Dong WJ, Li YS, Niu DC, et al. A simple route to prepare monodisperse Au NP-decorated, dye-doped, superparamagnetic nanocomposites for optical, MR, and CT trimodal imaging[J]. *Small*, 2013, 9:2500-2508.
- [52] Xue S, Wang Y, Wang M, et al. Iodinated oil-loaded, fluorescent mesoporous silica-coated iron oxide nanoparticles for magnetic resonance imaging/computed tomography/fluorescence trimodal imaging[J]. *Int. J. Nanomed.*, 2014, 9:2527-2538.
- [53] Yang G, Gong H, Liu T, et al. Two-dimensional magnetic  $\text{WS}_2@Fe_3O_4$  nanocomposite with mesoporous silica coating for drug delivery and imaging-guided therapy of cancer[J]. *Biomaterials*, 2015, 60:62-71.
- [54] Wu B, Wan B, Lu S-T, et al. Near-infrared light-triggered theranostics for tumor-specific enhanced multimodal imaging and photothermal therapy[J]. *Int. J. Nanomed.*, 2017, 12:4467-4478.
- [55] Han L, Xia J-M, Hai X, et al. Protein-stabilized gadolinium oxide-gold nanoclusters hybrid for multimodal imaging and drug delivery[J]. *ACS Appl. Mater. Interfaces*, 2017, 9:6941-6949.
- [56] Wu X, Li C, Liao S, et al. Silica-Encapsulated  $\text{Gd}^{3+}$ -Aggregated Gold Nanoclusters for In Vitro and In Vivo Multimodal Cancer Imaging[J]. *Chemistry-a European Journal*, 2014, 20:8876-8882.
- [57] Hu DH, Sheng ZH, Zhang PF, et al. Hybrid gold-gadolinium nanoclusters for tumor-targeted NIRF/CT/MRI triple-modal imaging in vivo[J]. *Nanoscale*, 2013, 5:1624-1628.
- [58] Dong K, Ju E, Liu J, et al. Ultrasmall biomolecule-anchored hybrid  $\text{GdVO}_4$  nanophosphors as a metabolizable multimodal bioimaging contrast agent[J]. *Nanoscale*, 2014, 6:12042-12049.
- [59] Deng X, Dai Y, Liu J, et al. Multifunctional hollow  $\text{CaF}_2:\text{Yb}^{3+}/\text{Er}^{3+}/\text{Mn}^{2+}$ -poly(2-aminoethyl methacrylate) microspheres for Pt(IV) pro-drug delivery and tri-modal imaging[J]. *Biomaterials*, 2015, 50:154-163.
- [60] Ma D, Meng L, Chen Y, et al.  $\text{NaGdF}_4:\text{Yb}^{3+}/\text{Er}^{3+}@NaGdF}_4:\text{Nd}^{3+}@Sodium-Gluconate$ : Multifunctional and Biocompatible Ultrasmall Core-Shell Nanohybrids for UCL/MR/CT Multimodal Imaging[J]. *Acs Applied Materials & Interfaces*, 2015, 7:16257-16265.



- [61] Zeng S, Tsang M-K, Chan C-F, et al. PEG modified BaGdF5:Yb/Er nanoprobe for multi-modal upconversion fluorescent, in vivo X-ray computed tomography and biomagnetic imaging[J]. *Biomaterials*, 2012, 33:9232-9238.
- [62] Xia A, Chen M, Gao Y, et al. Gd3+ complex-modified NaLuF4-based upconversion nanophosphors for trimodality imaging of NIR-to-NIR upconversion luminescence, X-Ray computed tomography and magnetic resonance[J]. *Biomaterials*, 2012, 33:5394-5405.
- [63] Xing H, Bu W, Zhang S, et al. Multifunctional nanoprobe for upconversion fluorescence, MR and CT trimodal imaging[J]. *Biomaterials*, 2012, 33:1079-1089.
- [64] Cohen R, Vugts DJ, Stigter-van Walsum M, et al. Inert coupling of IRDye800CW and zirconium-89 to monoclonal antibodies for single- or dual-mode fluorescence and PET imaging[J]. *Nature Protocols*, 2013, 8:1010-1018.
- [65] Ghosh SC, Ghosh P, Wilganowski N, et al. Multimodal chelation platform for near-infrared fluorescence/nuclear imaging[J]. *J. Med. Chem.*, 2013, 56:406-416.
- [66] Hall MA, Kwon S, Robinson H, et al. Imaging prostate cancer lymph node metastases with a multimodality contrast agent[J]. *Prostate*, 2012, 72:129-146.
- [67] Hall MA, Pinkston KL, Wilganowski N, et al. Comparison of mAbs Targeting Epithelial Cell Adhesion Molecule for the Detection of Prostate Cancer Lymph Node Metastases with Multimodal Contrast Agents: Quantitative Small-Animal PET/CT and NIRF[J]. *Journal of Nuclear Medicine*, 2012, 53:1427-1437.
- [68] Zhang Y, Hong H, Engle JW, et al. Positron Emission Tomography and Optical Imaging of Tumor CD105 Expression with a Dual-Labeled Monoclonal Antibody[J]. *Molecular Pharmaceutics*, 2012, 9:645-653.
- [69] Hong H, Zhang Y, Severin GW, et al. Multimodality Imaging of Breast Cancer Experimental Lung Metastasis with Bioluminescence and a Monoclonal Antibody Dual-Labeled with Zr-89 and IRDye 800CW[J]. *Molecular Pharmaceutics*, 2012, 9:2339-2349.
- [70] Sampath L, Kwon S, Hall MA, et al. Detection of cancer metastases with a dual-labeled near-infrared/positron emission tomography imaging agent[J]. *Transl. Oncol.*, 2010, 3:307-317.
- [71] Paudyal P, Paudyal B, Iida Y, et al. Dual functional molecular imaging probe targeting CD20 with PET and optical imaging[J]. *Oncology Reports*, 2009, 22:115-119.
- [72] Rodriguez EA, Wang Y, Crisp JL, et al. New dioxaborolane chemistry enables F-18 -positron-emitting, fluorescent F-18 -multimodality biomolecule generation from the solid phase[J]. *Bioconjugate Chem.*, 2016, 27:1390-1399.
- [73] Hendricks JA, Keliher EJ, Wan D, et al. Synthesis of F-18 BODIPY: bifunctional reporter for hybrid optical/positron emission tomography imaging[J]. *Angew. Chem. Int. Ed.*, 2012, 51:4603-4606.
- [74] Paulus A, Desai P, Carney B, et al. Development of a clickable bimodal fluorescent/PET probe for in vivo imaging[J]. *EJNMMI Res.*, 2015, 5:1-9.
- [75] Liu S, Lin T-P, Li D, et al. Lewis Acid-Assisted Isotopic F-18-F-19 Exchange in BODIPY Dyes: Facile Generation of Positron Emission Tomography/Fluorescence Dual Modality Agents for Tumor Imaging[J]. *Theranostics*, 2013, 3:181-189.
- [76] Summer D, Grossrubatscher L, Petrik M, et al. Developing targeted hybrid imaging probes by chelator scaffolding[J]. *Bioconjugate Chem.*, 2017, 28:1722-1733.
- [77] Brand C, Abdel-Atti D, Zhang Y, et al. In Vivo Imaging of GLP-1R with a Targeted Bimodal PET/Fluorescence Imaging Agent[J]. *Bioconjugate Chemistry*, 2014, 25:1323-1330.
- [78] Liu SL, Li D, Huang CW, et al. Efficient construction of PET/fluorescence probe based on sarcophagine cage: An opportunity to integrate diagnosis with treatment[J]. *Mol. Imaging Biol.*, 2012, 14:718-724.
- [79] Sun L, Ding J, Xing W, et al. Novel strategy for preparing dual-modality optical/PET imaging probes via photo-click chemistry[J]. *Bioconjugate Chem.*, 2016, 27:1200-1204.
- [80] Sun Y, Ma X, Cheng K, et al. Strained cyclooctyne as a molecular platform for construction of multimodal imaging probes[J]. *Angew. Chem. Int. Ed.*, 2015, 54:5981-5984.
- [81] Deng H, Wang H, Wang M, et al. Synthesis and Evaluation of 64Cu-DOTA-NT-Cy5.5 as a Dual-Modality PET/Fluorescence Probe to Image Neurotensin Receptor-Positive Tumor[J]. *Mol. Pharmaceutics*, 2015, 12:3054-3061.
- [82] Zhu L, Guo N, Li Q, et al. Dynamic PET and Optical Imaging and Compartment Modeling using a Dual-labeled Cyclic RGD Peptide Probe[J]. *Theranostics*, 2012, 2:746-756.
- [83] Zhang H, Desai P, Koike Y, et al. Dual-modality imaging of prostate cancer with a fluorescent and radiogallium-labeled gastrin-releasing peptide receptor antagonist[J]. *J. Nucl. Med.*, 2017, 58:29-35.
- [84] Ghosh SC, Vargas SH, Rodriguez M, et al. Synthesis of a Fluorescently Labeled Ga-68-DOTA-TOC Analog for Somatostatin Receptor Targeting[J]. *ACS Med. Chem. Lett.*, 2017, 8:720-725.
- [85] Xiao L, Zhang Y, Yue W, et al. Heptamethine cyanine based Cu-64-PET probe PC-1001 for cancer imaging: Synthesis and in vivo evaluation[J]. *Nucl. Med. Biol.*, 2013, 40:351-360.
- [86] Hu K, Wang H, Tang G, et al. In vivo cancer dual-targeting and dual-modality imaging with functionalized quantum dots[J]. *J. Nucl. Med.*, 2015, 56:1278-1284.
- [87] Kim JS, Kim YH, Kim JH, et al. Development and in vivo imaging of a PET/MRI nanoprobe with enhanced NIR fluorescence by dye encapsulation[J]. *Nanomedicine*, 2012, 7:219-229.
- [88] Paulus A, Maenen M, Drude N, et al. Synthesis, radiosynthesis and in vitro evaluation of F-18-Bodipy-C-16/triglyceride as a dual modal imaging agent for brown adipose tissue[J]. *PLoS One*, 2017, 12:0182297.
- [89] Ting R, Aguilera TA, Crisp JL, et al. Fast F-18 Labeling of a Near-Infrared Fluorophore Enables Positron Emission Tomography and Optical Imaging of Sentinel Lymph Nodes[J]. *Bioconjugate Chemistry*, 2010, 21:1811-1819.

- [90] An F-F, Kommidi H, Chen N, et al. A conjugate of pentamethine cyanine and F-18 as a positron emission tomography/near-infrared fluorescence probe for multimodality tumor imaging[J]. *Int. J. Mol. Sci.*, 2017, 18:1214.
- [91] Kommidi H, Guo H, Chen N, et al. An F-18 -positron-emitting, fluorescent, cerebrospinal fluid probe for imaging damage to the brain and spine[J]. *Theranostics*, 2017, 7:2377-2391.
- [92] Chansaenpak K, Wang H, Wang M, et al. Synthesis and evaluation of F-18 -ammonium BODIPY dyes as potential positron emission tomography agents for myocardial perfusion imaging[J]. *Chem. Eur. J.*, 2016, 22:12122-12129.
- [93] Bartholoma MD, Zhang SH, Akurathi V, et al. F-18-labeled rhodamines as potential myocardial perfusion agents: comparison of pharmacokinetic properties of several rhodamines[J]. *Nucl. Med. Biol.*, 2015, 42:796-803.
- [94] Liu S, Li D, Shan H, et al. Evaluation of F-18-labeled BODIPY dye as potential PET agents for myocardial perfusion imaging[J]. *Nucl. Med. Biol.*, 2014, 41:120-126.
- [95] Hekman MCH, Rijpkema M, Bos DL, et al. Detection of micrometastases using SPECT/fluorescence dual-modality imaging in a CEA-expressing tumor model[J]. *J. Nucl. Med.*, 2017, 58:706-710.
- [96] Rijpkema M, Oyen WJ, Bos D, et al. SPECT- and fluorescence image-guided surgery using a dual-labeled carcinoembryonic antigen-targeting antibody[J]. *J. Nucl. Med.*, 2014, 55:1519-1524.
- [97] Lutje S, Rijpkema M, Franssen GM, et al. Dual-modality image-guided surgery of prostate cancer with a radiolabeled fluorescent anti-PSMA monoclonal antibody[J]. *J. Nucl. Med.*, 2014, 55:995-1001.
- [98] Muselaers CHJ, Rijpkema M, Bos DL, et al. Radionuclide and fluorescence imaging of clear cell renal cell carcinoma using dual labeled anti-carbonic anhydrase IX antibody G250[J]. *J. Urol.*, 2015, 194:532-538.
- [99] Boonstra MC, van Driel PBAA, van Willigen DM, et al. uPAR-targeted multimodal tracer for pre- and intraoperative imaging in cancer surgery[J]. *Oncotarget*, 2015, 6:14260-14273.
- [100] Xu H, Eck PK, Baidoo KE, et al. Toward preparation of antibody-based imaging probe libraries for dual-modality positron emission tomography and fluorescence imaging[J]. *Bioorg. Med. Chem.*, 2009, 17:5176-5181.
- [101] Bhushan KR, Misra P, Liu F, et al. Detection of breast cancer microcalcifications using a dual-modality SPECT/NIR fluorescent probe[J]. *J. Am. Chem. Soc.*, 2008, 130:17648-17649.
- [102] Bunschoten A, Buckle T, Visser NL, et al. Multimodal interventional molecular imaging of tumor margins and distant metastases by targeting alpha v beta 3 Integrin[J]. *ChemBioChem*, 2012, 13:1039-1045.
- [103] Guo Y, Yuan H, Cho H, et al. High efficiency diffusion molecular retention tumor targeting[J]. *PLoS One*, 2013, 8:e58290.
- [104] Zhang Y, Xiao L, Popovic K, et al. Novel cancer-targeting SPECT/NIRF dual-modality imaging probe Tc-99m-PC-1007: Synthesis and biological evaluation[J]. *Bioorganic & Medicinal Chemistry Letters*, 2013, 23:6350-6354.
- [105] Guo Y, Yuan H, Claudio NM, et al. PEG-Like Nanoprobes: Multimodal, Pharmacokinetically and Optically Tunable Nanomaterials[J]. *Plos One*, 2014, 9
- [106] Dong C, Yang S, Shi J, et al. SPECT/NIRF dual modality imaging for detection of intraperitoneal colon tumor with an avidin/biotin pretargeting system[J]. *Sci. Rep.*, 2016, 6:18905.
- [107] KleinJan GH, Bunschoten A, van den Berg NS, et al. Fluorescence guided surgery and tracer-dose, fact or fiction?[J]. *Eur. J. Nucl. Med. Mol. Imaging*, 2016, 43:1857-1867.
- [108] Stoffels I, Leyh J, Poppel T, et al. Evaluation of a radioactive and fluorescent hybrid tracer for sentinel lymph node biopsy in head and neck malignancies: prospective randomized clinical trial to compare ICG-(99m)Tc-nanocolloid hybrid tracer versus (99m)Tc-nanocolloid[J]. *Eur J Nucl Med Mol Imaging*, 2015, 42:1631-1638.
- [109] Brouwer OR, Buckle T, Vermeeren L, et al. Comparing the Hybrid Fluorescent-Radioactive Tracer Indocyanine Green-Tc-99m-Nanocolloid with Tc-99m-Nanocolloid for Sentinel Node Identification: A Validation Study Using Lymphoscintigraphy and SPECT/CT[J]. *Journal of Nuclear Medicine*, 2012, 53:1034-1040.
- [110] Jing L, Shi J, Fan D, et al. Lu-177-labeled cerasomes encapsulating Indocyanine Green for cancer theranostics[J]. *ACS Appl. Mater. Interfaces*, 2015, 7:22095-22105.
- [111] Saatchi K, Soema P, Gelder N, et al. Hyperbranched polyglycerols as trimodal imaging agents: design, biocompatibility, and tumor uptake[J]. *Bioconjugate Chem.*, 2012, 23:372-381.
- [112] Mitchell N, Kalber TL, Cooper MS, et al. Incorporation of paramagnetic, fluorescent and PET/SPECT contrast agents into liposomes for multimodal imaging[J]. *Biomaterials*, 2013, 34:1179-1192.
- [113] Zhang R, Lu W, Wen X, et al. Annexin A5-Conjugated Polymeric Micelles for Dual SPECT and Optical Detection of Apoptosis[J]. *Journal of Nuclear Medicine*, 2011, 52:958-964.
- [114] Zhang R, Huang M, Zhou M, et al. Annexin A5-functionalized nanoparticle for multimodal imaging of cell death[J]. *Mol. Imaging*, 2013, 12:182-190.
- [115] Kamimura M, Saito R, Hyodo H, et al. Over-1000 nm near-infrared fluorescence and SPECT/CT dual-modal in vivo imaging based on rare-earth doped ceramic nanophosphors[J]. *J. Photopolym. Sci. Technol.*, 2016, 29:525-532.
- [116] Wang Y, Chen L, Liu X, et al. Detection of *Aspergillus fumigatus* pulmonary fungal infections in mice with Tc-99m-labeled MORF oligomers targeting ribosomal RNA[J]. *Nucl. Med. Biol.*, 2013, 40:89-96.
- [117] Duheron V, Moreau M, Collin B, et al. Dual labeling of lipopolysaccharides for SPECT-CT imaging and fluorescence microscopy[J]. *ACS Chem. Biol.*, 2014, 9:656-662.
- [118] Li Z, Zhang G, Shen H, et al. Synthesis and cell uptake of a novel dual modality 188Re-HGRGD (D) F-CdTe QDs probe[J]. *Talanta*, 2011, 85:936-942.

- [119] Francois A, Auzanneau C, Le Morvan V, et al. A functionalized heterobimetallic 99mTc/Re complex as a potential dual-modality imaging probe: synthesis, photophysical properties, cytotoxicity and cellular imaging investigations[J]. Dalton Trans., 2014, 43:439-450.
- [120] Guan T, Shang W, Li H, et al. From detection to resection: photoacoustic tomography and surgery guidance with Indocyanine Green loaded gold nanorod@liposome core-shell nanoparticles in liver cancer[J]. Bioconjugate Chem., 2017, 28:1221-1228.
- [121] Peng D, Du Y, Shi Y, et al. Precise diagnosis in different scenarios using photoacoustic and fluorescence imaging with dual-modality nanoparticles[J]. Nanoscale, 2016, 8:14480-14488.
- [122] Lozano N, Al-Jamal WT, Taruttis A, et al. Liposome-Gold Nanorod Hybrids for High-Resolution Visualization Deep in Tissues[J]. J. Am. Chem. Soc., 2012, 134:13256-13258.
- [123] Duan S, Yang YJ, Zhang CL, et al. NIR-responsive polycationic gatekeeper-cloaked hetero-nanoparticles for multimodal imaging-guided triple-combination therapy of cancer[J]. Small, 2017, 13:1603133.
- [124] Tan X, Wang J, Pang X, et al. Indocyanine green-loaded silver nanoparticle@polyaniline core/shell theranostic nanocomposites for photoacoustic/near-infrared fluorescence imaging-guided and single-light-triggered photothermal and photodynamic therapy[J]. ACS Appl. Mater. Interfaces, 2016, 8:34991-35003.
- [125] Liang X, Fang L, Li X, et al. Activatable near infrared dye conjugated hyaluronic acid based nanoparticles as a targeted theranostic agent for enhanced fluorescence/CT/photoacoustic imaging guided photothermal therapy[J]. Biomaterials, 2017, 132:72-84.
- [126] Xi L, Satpathy M, Zhao Q, et al. HER-2/neu targeted delivery of a nanoprobe enables dual photoacoustic and fluorescence tomography of ovarian cancer[J]. Nanomedicine (N. Y., NY, U. S.), 2014, 10:669-677.
- [127] Akers WJ, Kim C, Berezin M, et al. Noninvasive Photoacoustic and Fluorescence Sentinel Lymph Node Identification using Dye-Loaded Perfluorocarbon Nanoparticles[J]. Acs Nano, 2011, 5:173-182.
- [128] Xie LS, Wang GH, Zhou H, et al. Functional long circulating single walled carbon nanotubes for fluorescent/photoacoustic imaging-guided enhanced phototherapy[J]. Biomaterials, 2016, 103:219-228.
- [129] Lee HJ, Liu Y, Zhao J, et al. In vitro and in vivo mapping of drug release after laser ablation thermal therapy with doxorubicin-loaded hollow gold nanoshells using fluorescence and photoacoustic imaging[J]. J. Control. Release, 2013, 172:152-158.
- [130] Tang L, Zhang F, Yu F, et al. Croconaine nanoparticles with enhanced tumor accumulation for multimodality cancer theranostics[J]. Biomaterials, 2017, 129:28-36.
- [131] Miki K, Enomoto A, Inoue T, et al. Polymeric Self-Assemblies with Boron-Containing Near-Infrared Dye Dimers for Photoacoustic Imaging Probes[J]. Biomacromolecules, 2017, 18:249-256.
- [132] Chen J, Liu C, Zeng G, et al. Indocyanine green loaded reduced graphene oxide for in vivo photoacoustic/fluorescence dual-modality tumor imaging[J]. Nanoscale Res. Lett., 2016, 11:85.
- [133] Ermolayev V, Dean-Ben XL, Mandal S, et al. Simultaneous visualization of tumour oxygenation, neovascularization and contrast agent perfusion by real-time three-dimensional optoacoustic tomography[J]. Eur. Radiol., 2016, 26:1843-1851.
- [134] Beziere N, Lozano N, Nunes A, et al. Dynamic imaging of PEGylated indocyanine green (ICG) liposomes within the tumor microenvironment using multi-spectral optoacoustic tomography (MSOT)[J]. Biomaterials, 2015, 37:415-424.
- [135] Lozano N, Al-Ahmady ZS, Beziere NS, et al. Monoclonal antibody-targeted PEGylated liposome-ICG encapsulating doxorubicin as a potential theranostic agent[J]. International Journal of Pharmaceutics, 2015, 482:2-10.
- [136] Maeda A, Bu JC, Chen J, et al. Dual in vivo photoacoustic and fluorescence imaging of HER2 expression in breast tumors for diagnosis, margin assessment, and surgical guidance[J]. Mol. Imaging, 2014, 13:1-9.
- [137] Kim C, Song KH, Gao F, et al. Sentinel lymph nodes and lymphatic vessels: noninvasive dual-modality in vivo mapping by using indocyanine green in rats-volumetric spectroscopic photoacoustic imaging and planar fluorescence imaging[J]. Radiology, 2010, 255:442-450.
- [138] Kang N-Y, Park S-J, Ang XWE, et al. A macrophage uptaking near-infrared chemical probe CDnr7 for in vivo imaging of inflammation[J]. Chem. Commun., 2014, 50:6589-6591.
- [139] Sim N, Gottschalk S, Pal R, et al. Wavelength-dependent optoacoustic imaging probes for NMDA receptor visualisation[J]. Chem. Commun., 2015, 51:15149-15152.
- [140] Anees P, Joseph J, Sreejith S, et al. Real time monitoring of aminothiols level in blood using a near-infrared dye assisted deep tissue fluorescence and photoacoustic bimodal imaging[J]. Chem. Sci., 2016, 7:4110-4116.
